# Supplementary material for: Cell cycle and age-related modulations of mouse chromosome stiffness
Source: eLife. 2025 Apr 14;13:RP97403. doi: 10.7554/eLife.97403 (PMC11996174; doi:10.7554/eLife.97403)
Supplement: Figure 1—figure supplement 1—source data 1. [file elife-97403-fig1-figsupp1-data1.xlsx]

## Sheet: Figure 1-figure supplement 1 le
Figure 1-figure supplement 1 left panel Source Data 1
time(millisecond)	stiff pipette X-axis(micrometer)	stiff pipette Y-axis(micrometer)	force pipette X-axis(micrometer)	force pipette Y-axis(micrometer)
0	0.00905343	-0.0499416	0.0115935	-0.0558929
133	-0.186757	-0.0482487	-0.162829	-0.0645221
266	-0.175	-0.0485267	-0.138068	-0.0564821
393	0.00501689	-0.0484305	0.0175205	-0.0628726
529	-0.0743171	-0.0438053	-0.0572115	-0.0590107
668	-0.211825	-0.0518367	-0.183266	-0.0535126
796	-0.0834783	-0.0506924	-0.05625	-0.0612342
933	0.0113161	-0.0552941	0.0163636	-0.0520265
1066	-0.236319	-0.0510691	-0.221739	-0.0549331
1196	-0.223038	-0.0493056	-0.194118	-0.0559859
1336	-0.0185994	-0.0424492	-0.0111111	-0.055889
1463	-0.210197	-0.056689	-0.192061	-0.0635237
1599	-0.201583	-0.0431274	-0.179297	-0.0648502
1735	-0.00110583	-0.0499298	0.0065051	-0.051091
1863	-0.0911473	-0.0487299	-0.0881649	-0.054261
2003	-0.113973	-0.0466603	-0.0830769	-0.0620465
2131	-0.116864	-0.0450238	-0.09	-0.0603093
2264	-0.0374136	-0.0466956	-0.0199897	-0.0497133
2398	-0.0753803	-0.0531085	-0.0622234	-0.061545
2529	-0.16011	-0.0628927	-0.136607	-0.0586625
2666	-0.241156	-0.0616776	-0.220128	-0.0701225
2803	-0.0949962	-0.0657402	-0.0767046	-0.0583741
2934	-0.0928169	-0.0618898	-0.0887913	-0.0642628
3070	-0.192983	-0.0594859	-0.163911	-0.0602007
3196	-0.147259	-0.0443742	-0.119712	-0.0593156
3333	-0.158276	-0.0573847	-0.135896	-0.0539189
3472	-0.264037	-0.0560897	-0.247804	-0.0699717
3599	-0.0837942	-0.0539063	-0.0639423	-0.0556735
3734	0.0445545	-0.0541064	0.0521215	-0.0556686
3865	-0.0660163	-0.0477381	-0.040479	-0.0517065
3999	-0.205086	-0.0506545	-0.167614	-0.0582589
4140	-0.094581	-0.0253421	-0.0761539	-0.0574817
4266	-0.0184295	-0.050498	-0.00458333	-0.061526
4400	-0.128631	-0.0530015	-0.108811	-0.0579375
4537	-0.105498	-0.0469214	-0.082663	-0.0596366
4666	0.033816	-0.0642641	0.0541472	-0.0618982
4804	-0.0184414	-0.0482518	0.00191326	-0.0593617
4937	0.00699324	-0.0453923	0.02325	-0.0478854
5066	-0.000752005	-0.045239	0.0161413	-0.0568403
5201	-0.0785473	-0.0428882	-0.0711261	-0.0541364
5333	-0.118516	-0.0507024	-0.10035	-0.0526079
5469	-0.125922	-0.0432129	-0.1125	-0.0581776
5599	-0.0121702	-0.0466463	0.00335265	-0.0581137
5736	-0.117086	-0.0368636	-0.0940363	-0.0571095
5873	-0.06849	-0.0528516	-0.0550902	-0.0524059
6006	0.00601604	-0.0505845	0.02125	-0.0563406
6136	-0.13012	-0.0605103	-0.113393	-0.0595276
6275	-0.125716	-0.0495879	-0.110353	-0.0555288
6399	0.0912534	-0.0417939	0.108239	-0.0644796
6536	-0.170893	-0.0440217	-0.159839	-0.0598908
6670	-0.314173	-0.0494729	-0.292626	-0.0542107
6801	0.100258	-0.0425229	0.112981	-0.0543807
6941	-0.025641	-0.0430236	-0.0125933	-0.064677
7067	-0.241516	-0.0355885	-0.225546	-0.0606189
7203	-0.0238113	-0.0374409	-0.0216346	-0.0567857
7341	0.102323	-0.0498888	0.111171	-0.0580263
7469	-0.19297	-0.0446809	-0.16875	-0.0620468
7608	-0.196028	-0.0417891	-0.159472	-0.0552515
7735	0.0879127	-0.0409932	0.102624	-0.0602679
7870	0.0132759	-0.0531646	0.0306312	-0.0600234
8010	-0.177359	-0.0541843	-0.146847	-0.0602362
8136	-0.085864	-0.0297973	-0.0669643	-0.0514236
8271	0.127053	-0.0451397	0.14038	-0.0567211
8407	-0.121086	-0.0565251	-0.104002	-0.0598214
8537	-0.204487	-0.0401017	-0.159659	-0.0633266
8676	0.0901584	-0.0488032	0.104597	-0.0558811
8804	-0.0161709	-0.0510403	-0.00318396	-0.0602855
8937	-0.109611	-0.0535108	-0.0867011	-0.0561027
9077	-0.032178	-0.0395028	0.00221456	-0.0499416
9203	0.0253858	-0.0451203	0.0492912	-0.0569052
9339	-0.0862265	-0.0522367	-0.0646178	-0.0602615
9475	-0.0465203	-0.0505072	-0.03375	-0.0652919
9602	-0.0790709	-0.0480216	-0.063219	-0.0472763
9744	-0.0386364	-0.0443226	-0.009375	-0.0473592
9870	-0.0068784	-0.0397362	0.00982144	-0.063293
10006	-0.124807	-0.050981	-0.0993891	-0.0540785
10145	-0.0585082	-0.0367383	-0.0236413	-0.0587225
10270	-0.0167736	-0.0419882	-0.00920455	-0.05974
10408	0.0210353	-0.0459783	0.0496966	-0.0548077
10544	-0.211101	-0.0532767	-0.1825	-0.0550238
10672	-0.0949769	-0.0536488	-0.0685025	-0.0542732
10811	0.174545	-0.0518901	0.191687	-0.0566213
10937	-0.117458	-0.0621951	-0.10395	-0.0629138
11074	-0.0978194	-0.0517336	-0.0887324	-0.0591183
11211	0.220207	-0.0489669	0.225	-0.0617134
11339	0.100917	-0.0529028	0.097875	-0.065493
11478	-0.167921	-0.04492	-0.136298	-0.0649237
11610	0.127795	-0.0421068	0.134716	-0.0610577
11740	0.156877	-0.0472959	0.16875	-0.0577418
11881	-0.126051	-0.0595787	-0.104899	-0.0583029
12005	0.0321181	-0.042874	0.0573864	-0.0581442
12141	0.0910866	-0.042702	0.108239	-0.0556899
12277	-0.0125438	-0.0409858	0.00496323	-0.0559468
12409	-0.0467726	-0.0495	-0.0196646	-0.0557709
12548	-0.00505953	-0.0449344	0.00671642	-0.0633703
12680	0.0415678	-0.0503157	0.0649879	-0.0632343
12807	0.08125	-0.0603093	0.101051	-0.0528974
12948	-0.0437102	-0.0574711	-0.0190257	-0.0558525
13073	0.0981284	-0.0550218	0.116734	-0.0617355
13211	0.21875	-0.0548946	0.232386	-0.064375
13342	-0.0241755	-0.0481403	-0.00590035	-0.0608157
13473	0.101153	-0.0473182	0.1125	-0.0598641
13614	0.114655	-0.0421002	0.138068	-0.0563996
13740	0.1259	-0.0486217	0.148701	-0.0643676
13877	0.127943	-0.0516316	0.152534	-0.0564847
14014	0.0659551	-0.0395312	0.0879545	-0.0529681
14140	0.117514	-0.0387605	0.128099	-0.0577982
14278	0.228594	-0.0539902	0.244922	-0.0614708
14408	0.0231345	-0.0521557	0.037672	-0.0547078
14544	0.075963	-0.0538269	0.101414	-0.0608456
14680	0.296324	-0.049227	0.321964	-0.073067
14808	0.0378606	-0.0631699	0.0701675	-0.0455097
14945	0.133663	-0.0427576	0.163805	-0.0597882
15082	0.216395	-0.0519753	0.237445	-0.0615262
15210	0.0847973	-0.0569423	0.10712	-0.0558195
15348	0.198872	-0.0497624	0.227596	-0.0443182
15481	0.205461	-0.05054	0.229327	-0.0558795
15611	0.114805	-0.033632	0.12984	-0.0581688
15752	0.151103	-0.0470558	0.185625	-0.0542808
15877	0.149726	-0.0538843	0.17642	-0.0572627
16013	0.044778	-0.045471	0.0689859	-0.0566535
16148	0.151121	-0.0558057	0.171397	-0.061444
16276	0.246405	-0.0490866	0.269282	-0.056875
16418	0.297842	-0.0529131	0.323818	-0.0597403
16543	0.0824603	-0.0475216	0.111673	-0.0551944
16680	0.220362	-0.0409252	0.247098	-0.0537849
16817	0.388258	-0.0524735	0.43297	-0.0603541
16943	0.0516945	-0.0604497	0.0759665	-0.0591556
17083	0.119739	-0.0404074	0.143315	-0.0659049
17213	0.466762	-0.0569312	0.514369	-0.0622159
17347	0.197889	-0.0638086	0.216964	-0.0598018
17484	0.079478	-0.0525877	0.0991624	-0.0522026
17611	0.408601	-0.0536003	0.440195	-0.0582881
17748	0.293363	-0.0517798	0.315	-0.0629814
17885	0.0297032	-0.0407666	0.0689858	-0.0533554
18013	0.248108	-0.0422319	0.290302	-0.0528305
18150	0.364439	-0.0533602	0.391331	-0.0592105
18284	0.219724	-0.0542806	0.2434	-0.059879
18415	0.163832	-0.0342262	0.208513	-0.053066
18549	0.443489	-0.0426658	0.478618	-0.0577282
18680	0.360553	-0.0507143	0.384276	-0.05472
18815	0.114904	-0.0285811	0.145066	-0.0521559
18951	0.337986	-0.0416978	0.363259	-0.0569098
19082	0.260684	-0.0518767	0.307721	-0.0596269
19216	0.168119	-0.0494885	0.202621	-0.0548182
19351	0.490935	-0.0410806	0.53685	-0.0608578
19480	0.339029	-0.053984	0.370516	-0.0570786
19615	0.333112	-0.0404564	0.364033	-0.0573248
19748	0.510014	-0.0479128	0.542411	-0.0506772
19885	0.427004	-0.0544168	0.460029	-0.0658661
20015	0.254189	-0.0467968	0.298456	-0.0611529
20147	0.55223	-0.0476141	0.585417	-0.0547826
20286	0.462857	-0.0523199	0.493359	-0.0602901
20415	0.253441	-0.0545128	0.293304	-0.0576316
20551	0.33517	-0.0521053	0.37884	-0.0595844
20686	0.478292	-0.0505208	0.511306	-0.0590875
20814	0.410051	-0.0561361	0.447596	-0.0526993
20956	0.241361	-0.0604668	0.268492	-0.0530585
21088	0.538417	-0.0474583	0.585536	-0.06
21217	0.52813	-0.0478643	0.569464	-0.0602348
21355	0.32107	-0.0442362	0.36	-0.0605482
21481	0.33694	-0.0394521	0.386719	-0.0547899
21618	0.448122	-0.0455176	0.492187	-0.05625
21755	0.454315	-0.04354	0.496676	-0.0549086
21884	0.359431	-0.0629354	0.421382	-0.0606583
22022	0.332429	-0.0406208	0.368347	-0.0595149
22149	0.523301	-0.0381569	0.569408	-0.0534218
22284	0.543273	-0.0594541	0.572832	-0.0560454
22420	0.195887	-0.0450213	0.227045	-0.0526148
22550	0.523669	-0.0588519	0.574875	-0.0552189
22685	0.588133	-0.0558725	0.649125	-0.0551212
22821	0.305848	-0.0517065	0.344967	-0.0571198
22949	0.415773	-0.0548341	0.461696	-0.0607337
23091	0.652054	-0.0454057	0.702648	-0.0529827
23218	0.489015	-0.0476882	0.541894	-0.0594806
23352	0.414755	-0.0528465	0.453013	-0.0571602
23491	0.572049	-0.0474426	0.615121	-0.05625
23617	0.502453	-0.0449249	0.552168	-0.0655561
23756	0.473464	-0.0473761	0.534375	-0.0575541
23891	0.409693	-0.0426217	0.451607	-0.0535151
24018	0.55159	-0.0505976	0.598295	-0.0569223
24158	0.514762	-0.0482838	0.566518	-0.0569561
24284	0.475267	-0.0526596	0.531484	-0.063358
24422	0.480586	-0.0459951	0.52875	-0.0579979
24553	0.502519	-0.0469442	0.556473	-0.0678879
24685	0.595356	-0.0512695	0.667623	-0.0678702
24824	0.486021	-0.0439739	0.556045	-0.0546083
24958	0.483131	-0.0450626	0.543406	-0.0689024
25088	0.610714	-0.035824	0.679091	-0.0509977
25226	0.579924	-0.050382	0.617658	-0.0621995
25351	0.430227	-0.0495954	0.472989	-0.0632813
25487	0.671582	-0.0470838	0.740199	-0.0567976
25625	0.699783	-0.0449186	0.767285	-0.0563243
25756	0.479237	-0.045681	0.543029	-0.0595123
25889	0.658083	-0.0333206	0.716106	-0.0567453
26023	0.650571	-0.0415064	0.711161	-0.0549914
26154	0.596911	-0.0470509	0.673977	-0.0605253
26295	0.615784	-0.0471905	0.676395	-0.0581503
26421	0.59635	-0.0440569	0.667114	-0.0536466
26558	0.605975	-0.042551	0.675481	-0.0529621
26692	0.60116	-0.0531151	0.672481	-0.0516746
26820	0.543589	-0.0488822	0.59375	-0.0602548
26962	0.57449	-0.0571798	0.648047	-0.0549043
27088	0.585081	-0.0516258	0.658019	-0.0579375
27224	0.601238	-0.0412441	0.673628	-0.0544756
27360	0.669298	-0.038122	0.758882	-0.0492476
27487	0.578847	-0.0456242	0.65059	-0.0587891
27628	0.593953	-0.04753	0.674527	-0.0483275
27761	0.680424	-0.0545902	0.758864	-0.0633681
27890	0.640901	-0.0492188	0.702246	-0.0652624
28029	0.704852	-0.0501987	0.782227	-0.047823
28154	0.788586	-0.0563851	0.857526	-0.0581583
28292	0.722506	-0.0383481	0.793484	-0.0513812
28428	0.650447	-0.0355341	0.73125	-0.0525929
28557	0.684611	-0.0458678	0.765489	-0.0577878
28695	0.657728	-0.0503231	0.727973	-0.0539931
28827	0.656357	-0.0469268	0.735221	-0.0575543
28958	0.685376	-0.0560317	0.773922	-0.0585428
29099	0.699689	-0.0460296	0.787883	-0.0631607
29224	0.693533	-0.0534508	0.780163	-0.0505769
29358	0.729445	-0.0458459	0.810865	-0.0578244
29495	0.691106	-0.0493356	0.78125	-0.051553
29628	0.725803	-0.0527275	0.813424	-0.0595184
29765	0.751141	-0.0573444	0.825876	-0.0547599
29891	0.715543	-0.0472576	0.80652	-0.0581897
30025	0.743265	-0.0538534	0.822083	-0.0668594
30165	0.789351	-0.0413014	0.879634	-0.0607218
30291	0.75086	-0.0497271	0.8375	-0.0579935
30430	0.747246	-0.0526506	0.825323	-0.0603577
30562	0.772088	-0.0518534	0.842625	-0.0581749
30691	0.714597	-0.0453358	0.801562	-0.0483706
30832	0.850758	-0.0495183	0.93659	-0.0633544
30958	0.807287	-0.0527111	0.903642	-0.0581087
31095	0.80448	-0.0527628	0.903201	-0.0556931
31231	0.893638	-0.0532764	0.975987	-0.0573458
31359	0.799402	-0.0523081	0.89175	-0.0622279
31498	0.87325	-0.0427296	0.955199	-0.0571938
31631	0.918529	-0.054717	1.00757	-0.0585125
31761	0.818003	-0.050625	0.917308	-0.0492958
31894	0.89278	-0.051693	0.997308	-0.0564388
32025	0.88657	-0.0465976	0.988245	-0.0589446
32161	0.884601	-0.0472351	0.987925	-0.0547641
32299	0.90255	-0.0508163	1.00392	-0.0530836
32430	0.731831	-0.0601319	0.83125	-0.0598287
32566	1.01488	-0.0413472	1.12753	-0.057755
32698	1.00652	-0.0454574	1.10555	-0.0586738
32842	0.794724	-0.0522477	0.906789	-0.0603966
32968	0.975486	-0.0458387	1.06055	-0.0506474
33094	1.10094	-0.0346154	1.21112	-0.0474422
33228	0.782373	-0.0463407	0.893957	-0.0595588
33360	0.9217	-0.0515337	1.03219	-0.0587478
33493	1.08369	-0.0507605	1.18254	-0.052384
33636	0.865034	-0.0526434	0.976616	-0.0576607
33761	0.943209	-0.046125	1.05341	-0.0547179
33896	1.01162	-0.0454824	1.12705	-0.0557786
34032	1.0371	-0.042278	1.14249	-0.0580832
34161	0.881842	-0.0416562	0.995777	-0.0541944
34302	1.0125	-0.0487811	1.12708	-0.052281
34432	1.13718	-0.0510629	1.2458	-0.0603143
34562	0.903178	-0.0396169	1.02452	-0.0485938
34698	1.03423	-0.0493636	1.14529	-0.0510448
34828	1.08703	-0.0512679	1.20938	-0.0594895
34966	0.981703	-0.0477956	1.08801	-0.0619338
35100	0.89134	-0.0407771	1.01732	-0.0597076
35231	1.01172	-0.0506453	1.12589	-0.0553177
35368	1.04943	-0.0220425	1.17851	-0.0547348
35502	0.961742	-0.0437588	1.08497	-0.0583142
35631	1.08431	-0.047404	1.19771	-0.0494377
35770	1.15696	-0.0548437	1.27384	-0.0491943
35895	1.09795	-0.0464008	1.20335	-0.0589446
36032	1.04296	-0.0475028	1.17168	-0.0534257
36169	1.11647	-0.0390927	1.24384	-0.0536316
36297	1.03796	-0.0430025	1.16518	-0.052556
36442	1.08345	-0.0456647	1.21339	-0.057629
36562	1.1057	-0.045282	1.2375	-0.0589874
36699	1.20823	-0.056508	1.33446	-0.0539805
36837	1.19137	-0.0516133	1.30488	-0.055203
36965	1.15356	-0.0392592	1.27517	-0.0520575
37103	1.18945	-0.0478325	1.32321	-0.0529605
37236	1.23071	-0.04589	1.35659	-0.0641815
37365	1.08652	-0.0482677	1.21579	-0.0556543
37502	1.18282	-0.0478004	1.31542	-0.0535358
37632	1.25912	-0.0507325	1.38782	-0.0595714
37766	1.1161	-0.0531729	1.24046	-0.0538235
37903	1.20713	-0.0470963	1.34366	-0.0580645
38033	1.2403	-0.0501086	1.37448	-0.0585
38170	1.14901	-0.0506024	1.28839	-0.053706
38305	1.15749	-0.0551697	1.29886	-0.0486111
38433	1.30048	-0.0541077	1.44442	-0.0538382
38573	1.21328	-0.04725	1.34546	-0.0655967
38698	1.2553	-0.0525754	1.39592	-0.0470663
38835	1.2849	-0.0495336	1.44606	-0.0495948
38973	1.26691	-0.03735	1.41351	-0.0598603
39098	1.27276	-0.0567997	1.41614	-0.061944
39240	1.26648	-0.0451452	1.41763	-0.0577922
39366	1.23493	-0.0345499	1.37337	-0.0512376
39503	1.2728	-0.0557621	1.42582	-0.0607225
39640	1.26749	-0.0458947	1.41572	-0.0559191
39766	1.28895	-0.0483779	1.44743	-0.0568701
39901	1.25029	-0.0457529	1.38807	-0.0563321
40040	1.29416	-0.0490086	1.43693	-0.0589286
40168	1.36875	-0.0460068	1.52263	-0.0569531
40308	1.22437	-0.0429626	1.37087	-0.0584851
40433	1.30207	-0.0464575	1.45031	-0.0532415
40569	1.37938	-0.0467478	1.53991	-0.0573077
40708	1.16112	-0.0482717	1.32114	-0.0535267
40835	1.17781	-0.0455882	1.33875	-0.0608108
40973	1.36443	-0.0467956	1.52259	-0.0569196
41106	1.34283	-0.0546322	1.49364	-0.0628977
41236	1.17398	-0.0474891	1.34408	-0.053066
41377	1.37156	-0.0619236	1.53164	-0.0556735
41502	1.45229	-0.0516361	1.60366	-0.0512195
41638	1.20291	-0.0466956	1.35858	-0.055776
41769	1.25303	-0.0328125	1.42373	-0.0560625
41905	1.52462	-0.0433982	1.68655	-0.0592781
42043	1.28954	-0.0466817	1.45687	-0.0566047
42170	1.1663	-0.0479953	1.32845	-0.0553992
42304	1.48045	-0.0415246	1.6425	-0.0568463
42443	1.34605	-0.0467089	1.4983	-0.0634399
42568	1.25795	-0.0481641	1.42395	-0.0594934
42706	1.40482	-0.0475796	1.57401	-0.0576501
42842	1.4275	-0.0574275	1.58607	-0.0644058
42970	1.20526	-0.0487855	1.36649	-0.0588945
43106	1.41398	-0.051573	1.57295	-0.0653783
43236	1.42824	-0.0560989	1.58332	-0.0621826
43374	1.33629	-0.060853	1.50331	-0.0582334
43511	1.43198	-0.051182	1.5956	-0.0582955
43638	1.49363	-0.0497879	1.66132	-0.0583674
43773	1.36065	-0.0466755	1.53884	-0.0538758
43909	1.3429	-0.0518272	1.51527	-0.056878
44039	1.44739	-0.0403188	1.61467	-0.0559711
44179	1.40368	-0.0452765	1.57602	-0.0638169
44305	1.36968	-0.0542763	1.56056	-0.0596904
44440	1.50939	-0.0477312	1.68889	-0.0625232
44571	1.49445	-0.0479454	1.67038	-0.0576923
44706	1.37278	-0.0569918	1.54735	-0.06372
44846	1.48769	-0.0411551	1.66796	-0.0518499
44972	1.47575	-0.0509653	1.66339	-0.0485622
45106	1.37247	-0.0405288	1.56455	-0.0636151
45247	1.47036	-0.0469397	1.63125	-0.0530488
45372	1.47656	-0.054708	1.66386	-0.0563276
45508	1.37349	-0.0638554	1.55732	-0.0591346
45644	1.46082	-0.0550418	1.64148	-0.0559223
45772	1.49231	-0.051641	1.67566	-0.0551442
45914	1.40071	-0.0529648	1.58684	-0.0521112
46040	1.50466	-0.0493172	1.68375	-0.0507353
46176	1.50512	-0.0514977	1.68601	-0.060783
46311	1.45889	-0.054758	1.65038	-0.0588556
46439	1.54573	-0.0446469	1.7233	-0.0600302
46576	1.50147	-0.041545	1.69497	-0.050625
46708	1.4471	-0.0453685	1.62123	-0.0508294
46842	1.53054	-0.0526267	1.71061	-0.0571044
46979	1.5299	-0.058764	1.71191	-0.0593529
47106	1.48042	-0.0445579	1.67853	-0.0451061
47243	1.57276	-0.0484799	1.7625	-0.0548554
47380	1.57447	-0.0497535	1.76606	-0.0561377
47507	1.51675	-0.0442089	1.70625	-0.0614957
47645	1.49748	-0.0502232	1.68113	-0.061681
47779	1.53039	-0.051594	1.72162	-0.0611903
47909	1.54101	-0.0566137	1.7375	-0.0601133
48045	1.59707	-0.0526989	1.78092	-0.06375
48176	1.51008	-0.0424401	1.70746	-0.06499
48310	1.63954	-0.0452293	1.82534	-0.0664661
48447	1.65878	-0.0480368	1.84787	-0.0636676
48578	1.44891	-0.0639172	1.6425	-0.0572061
48718	1.65525	-0.0431528	1.83917	-0.057373
48843	1.80371	-0.0469512	2.00966	-0.0561755
48986	1.55469	-0.0628006	1.7558	-0.0629525
49117	1.59148	-0.0427799	1.80225	-0.0508306
49242	1.81323	-0.0275912	2.00958	-0.0559091
49379	1.62569	-0.0511466	1.81712	-0.0565108
49510	1.40271	-0.0342894	1.60898	-0.0545809
49642	1.74163	-0.0378131	1.95736	-0.0549265
49779	1.79081	-0.0528661	1.99059	-0.0563892
49910	1.42987	-0.0583741	1.6408	-0.065654
50047	1.64719	-0.045	1.85864	-0.05625
50183	1.84394	-0.0475679	2.04107	-0.0629132
50309	1.52308	-0.0584314	1.74122	-0.0523069
50450	1.59192	-0.0553002	1.80482	-0.0599797
50583	1.78302	-0.0446484	1.99398	-0.0608501
50713	1.67765	-0.0528308	1.88265	-0.0666045
50851	1.62921	-0.0505258	1.83011	-0.0669304
50977	1.67221	-0.0504955	1.89341	-0.0591763
51113	1.75017	-0.0491516	1.95875	-0.0577811
51245	1.74555	-0.0401462	1.95798	-0.054745
51379	1.57969	-0.0198017	1.79869	-0.0565994
51518	1.66102	-0.0467377	1.8641	-0.0581442
51650	1.80096	-0.0447234	2.01537	-0.056625
51780	1.69179	-0.0480256	1.91691	-0.063982
51921	1.55429	-0.0423325	1.77079	-0.0566176
52046	1.80586	-0.0524918	2.03063	-0.05625
52181	1.79862	-0.0536402	2.02454	-0.060651
52312	1.66134	-0.0590508	1.8823	-0.0589494
52445	1.7874	-0.0427194	2.01042	-0.0593983
52587	1.86869	-0.0495174	2.09375	-0.0559843
52713	1.84397	-0.046792	2.06193	-0.0680444
52849	1.69405	-0.0502251	1.9204	-0.0513193
52987	1.79743	-0.0447146	2.01943	-0.0619452
53112	1.91591	-0.0543561	2.14175	-0.0566347
53250	1.72978	-0.0528261	1.96181	-0.0598101
53386	1.7813	-0.049459	1.99787	-0.0584942
53515	1.99092	-0.0540698	2.19892	-0.0624427
53653	1.90529	-0.0506179	2.13894	-0.0573664
53779	1.87005	-0.0464325	2.09462	-0.0584851
53917	1.88809	-0.0434184	2.10979	-0.0554374
54054	1.9338	-0.0369081	2.15787	-0.0601992
54181	1.86257	-0.0463626	2.09093	-0.0502318
54319	1.79297	-0.0534205	2.01612	-0.0507847
54453	1.92169	-0.0505263	2.14723	-0.0511206
54582	1.94407	-0.0543007	2.16394	-0.0616587
54724	1.8769	-0.0543062	2.09837	-0.0571613
54849	1.89386	-0.05995	2.12034	-0.0613494
54983	1.91517	-0.0520604	2.13706	-0.0574515
55120	2.00247	-0.0577041	2.22034	-0.057842
55252	1.94625	-0.0558585	2.17144	-0.0544127
55390	1.83934	-0.0455455	2.0848	-0.0517347
55519	1.94993	-0.0309411	2.17875	-0.052014
55650	2.01468	-0.0537348	2.24226	-0.0581749
55784	1.81869	-0.0477462	2.04572	-0.0579766
55916	1.8683	-0.0357333	2.11511	-0.0522973
56054	2.11789	-0.0483365	2.35173	-0.0516746
56183	1.8247	-0.0440101	2.05781	-0.0514073
56316	1.84037	-0.0517764	2.06591	-0.0533299
56458	2.10059	-0.0470008	2.31736	-0.0575233
56584	1.95091	-0.0663227	2.19605	-0.054931
56719	2.00782	-0.0490909	2.24768	-0.0558525
56855	2.09794	-0.0549577	2.32356	-0.0565838
56983	2.00608	-0.0399841	2.25225	-0.0551098
57123	2.02742	-0.0476821	2.26406	-0.0519753
57257	2.07502	-0.051208	2.31272	-0.0575625
57386	1.94632	-0.0499466	2.20909	-0.0549254
57525	2.17194	-0.0508181	2.42679	-0.0475885
57650	2.0694	-0.0455028	2.31914	-0.0566512
57787	2.01534	-0.0503616	2.26678	-0.0554837
57924	2.11291	-0.0570354	2.36518	-0.0591912
58053	2.05806	-0.0531	2.30504	-0.0599865
58187	2.15395	-0.0436686	2.41694	-0.0609206
58323	2.10629	-0.0509174	2.35006	-0.0604735
58453	2.04815	-0.0450853	2.29899	-0.0516393
58594	2.18839	-0.0418056	2.44926	-0.0614897
58719	2.12146	-0.0538803	2.36358	-0.0512477
58853	1.96433	-0.0458009	2.22557	-0.0583696
58985	2.16273	-0.0423351	2.40886	-0.0621951
59118	2.21247	-0.0606301	2.45587	-0.0570101
59261	2.01042	-0.0426948	2.26348	-0.0592456
59387	2.14199	-0.0361974	2.40903	-0.04375
59523	2.21381	-0.059706	2.46762	-0.0592347
59660	2.0433	-0.0529267	2.29245	-0.062561
59785	2.11367	-0.0518008	2.36761	-0.0523305
59926	2.18784	-0.0466714	2.44522	-0.0599052
60055	2.17222	-0.0455092	2.44125	-0.0578411
60187	2.13557	-0.0456444	2.37962	-0.059507
60327	2.13619	-0.0444687	2.38332	-0.0541731
60453	2.16284	-0.0441106	2.42578	-0.0574921
60591	2.16263	-0.0556435	2.40255	-0.0592862
60725	2.11684	-0.052472	2.38434	-0.0568484
60855	2.20382	-0.0383077	2.45765	-0.0540179
60992	2.10522	-0.0534375	2.35997	-0.0530459
61127	2.24194	-0.044719	2.49034	-0.0612209
61256	2.19751	-0.055509	2.45345	-0.0535322
61395	2.11276	-0.0488822	2.37397	-0.0531091
61520	2.23234	-0.0446475	2.49254	-0.0565365
61657	2.23619	-0.0581507	2.4978	-0.0578017
61794	2.22354	-0.046978	2.47882	-0.0635354
61925	2.28101	-0.0429239	2.55833	-0.0556741
62062	2.2545	-0.0483883	2.5114	-0.0492557
62189	2.23729	-0.0474227	2.49336	-0.0552802
62324	2.22871	-0.0560339	2.49114	-0.0541018
62465	2.15364	-0.0514217	2.43769	-0.0502589
62590	2.15312	-0.0501344	2.42587	-0.0499044
62726	2.3208	-0.0592105	2.59387	-0.0596758
62861	2.15044	-0.0532528	2.39981	-0.0602554
62989	2.26293	-0.0520416	2.54261	-0.0569901
63130	2.45457	-0.0535995	2.71682	-0.0660271
63257	2.29942	-0.0561864	2.57732	-0.0560879
63392	2.20003	-0.052101	2.46445	-0.0563367
63527	2.3775	-0.0574528	2.65653	-0.0563736
63656	2.45439	-0.0622854	2.70963	-0.0603814
63797	2.21813	-0.0517198	2.48418	-0.0625225
63930	2.25581	-0.0396448	2.52946	-0.0557609
64058	2.55641	-0.0542331	2.81801	-0.0601364
64198	2.26745	-0.05191	2.5506	-0.0572617
64323	2.10875	-0.0394193	2.37893	-0.0521688
64461	2.42748	-0.0442776	2.6875	-0.0626984
64598	2.33785	-0.0508178	2.60442	-0.0528409
64727	2.12451	-0.0507353	2.40412	-0.0597926
64865	2.33819	-0.0405915	2.6108	-0.0546788
64997	2.37127	-0.0501404	2.66026	-0.0539256
65127	2.27231	-0.0519319	2.56118	-0.0553628
65262	2.25587	-0.0501393	2.53504	-0.0641973
65391	2.37127	-0.0626481	2.65169	-0.0596685
65527	2.35005	-0.0481539	2.62919	-0.0535326
65665	2.33617	-0.0547108	2.60581	-0.0619338
65793	2.27834	-0.042989	2.56684	-0.0556641
65930	2.30625	-0.0493227	2.58606	-0.0580263
66058	2.39421	-0.0565708	2.66538	-0.0584382
66194	2.18536	-0.0497978	2.45321	-0.0582143
66333	2.33735	-0.0618682	2.60377	-0.0572266
66460	2.40331	-0.0541879	2.67381	-0.0565092
66598	2.26017	-0.0589494	2.51385	-0.0568516
66731	2.34314	-0.0488298	2.61973	-0.0515231
66861	2.32049	-0.0514746	2.59354	-0.05625
66998	2.28342	-0.0477896	2.56091	-0.0548946
67127	2.32139	-0.0447289	2.58949	-0.0473237
67264	2.32576	-0.055859	2.59679	-0.0501168
67399	2.33181	-0.0448869	2.61059	-0.0545008
67528	2.49113	-0.0499112	2.76997	-0.0538706
67667	2.27607	-0.0520583	2.56875	-0.0608491
67796	2.34445	-0.0418919	2.62383	-0.05625
67930	2.47394	-0.039527	2.72973	-0.044375
68069	2.22938	-0.051674	2.49971	-0.0636977
68194	2.28267	-0.0488324	2.55833	-0.0631675
68331	2.44822	-0.0457747	2.70721	-0.0581095
68463	2.37338	-0.0587895	2.63211	-0.0607595
68599	2.36742	-0.0483631	2.64104	-0.051608
68730	2.36566	-0.0573529	2.64375	-0.0611079
68861	2.38172	-0.0492187	2.65743	-0.0687796
68998	2.42003	-0.0643034	2.69211	-0.0558496
69137	2.33373	-0.0532453	2.60257	-0.0537592
69263	2.3502	-0.0504808	2.625	-0.0679803
69400	2.50791	-0.0547146	2.79994	-0.0556967
69534	2.24713	-0.0495839	2.51689	-0.0535816
69664	2.29488	-0.0546365	2.58317	-0.0580645
69800	2.39248	-0.036934	2.68278	-0.0603516
69930	2.3359	-0.0519444	2.59946	-0.0576219
70065	2.24762	-0.0548693	2.53981	-0.0547179
70201	2.47849	-0.0584246	2.74709	-0.0582052
70329	2.45964	-0.0614782	2.71712	-0.0575364
70471	2.33404	-0.0489919	2.60759	-0.0564607
70599	2.41283	-0.049186	2.69019	-0.0608173
70731	2.37044	-0.0495699	2.65359	-0.0586184
70872	2.43665	-0.0398494	2.69833	-0.0542725
70998	2.31707	-0.0429591	2.59522	-0.0529309
71134	2.29995	-0.0436036	2.58091	-0.0534677
71266	2.43578	-0.0475061	2.7071	-0.0546821
71401	2.35509	-0.0495742	2.63633	-0.0550781
71539	2.24288	-0.0459975	2.53246	-0.0606096
71671	2.4581	-0.0383455	2.73444	-0.0602419
71800	2.45585	-0.0501414	2.72868	-0.0601992
71939	2.26038	-0.0557444	2.55967	-0.0618321
72064	2.49199	-0.0461392	2.7739	-0.058
72201	2.44945	-0.0554703	2.72089	-0.0652672
72338	2.37589	-0.0550585	2.67644	-0.0597917
72466	2.40486	-0.0496524	2.69386	-0.0489031
72605	2.41967	-0.0564316	2.69861	-0.0586957
72731	2.43678	-0.0578406	2.7135	-0.0584888
72868	2.529	-0.0539117	2.8024	-0.0619307
73005	2.3747	-0.0475115	2.64917	-0.0663265
73133	2.46309	-0.0414935	2.754	-0.060975
73269	2.53525	-0.0423432	2.81458	-0.058391
73400	2.32791	-0.0536765	2.61625	-0.0555556
73534	2.45876	-0.0421221	2.72647	-0.0566213
73675	2.47012	-0.0601525	2.73768	-0.0574831
73801	2.36621	-0.0555195	2.65115	-0.0609452
73936	2.49102	-0.041293	2.76648	-0.0501656
74071	2.53901	-0.0548624	2.80323	-0.0557942
74202	2.4422	-0.0478698	2.72263	-0.0591884
74340	2.4861	-0.0419712	2.76502	-0.057512
74474	2.44674	-0.0521099	2.72784	-0.065806
74602	2.40117	-0.0404209	2.6881	-0.0570676
74742	2.39603	-0.0479266	2.68166	-0.0665681
74867	2.48157	-0.0467511	2.77627	-0.0646875
75004	2.45548	-0.0503171	2.72676	-0.0560241
75136	2.39753	-0.0421698	2.68955	-0.0764204
75267	2.44614	-0.0502232	2.72495	-0.0581897
75405	2.46685	-0.0399417	2.75494	-0.054527
75534	2.30883	-0.0476504	2.59994	-0.0571221
75685	2.42081	-0.0465465	2.70234	-0.0608733
75805	2.59293	-0.0517051	2.87023	-0.0574331
75935	2.25709	-0.0447095	2.5489	-0.0570113
76074	2.36356	-0.0427361	2.66296	-0.0527344
76209	2.51456	-0.0489031	2.80497	-0.0597857
76337	2.28708	-0.0512097	2.5875	-0.0549198
76475	2.30751	-0.0494845	2.587	-0.0602376
76602	2.60957	-0.0517857	2.8892	-0.0606413
76738	2.35224	-0.0596104	2.64742	-0.0690845
76876	2.34135	-0.0453185	2.61949	-0.0669706
77003	2.57044	-0.0480653	2.83831	-0.0583997
77141	2.38052	-0.0631699	2.67095	-0.0630898
77275	2.42785	-0.0510563	2.70201	-0.0501155
77405	2.47887	-0.0366532	2.76438	-0.0647148
77540	2.48076	-0.0522361	2.75496	-0.0544548
77671	2.49769	-0.0537898	2.78888	-0.0570241
77807	2.43093	-0.0538646	2.70551	-0.0559615
77937	2.44756	-0.0390221	2.7127	-0.044646
78075	2.55588	-0.0544708	2.8375	-0.0616587
78212	2.30888	-0.0524715	2.59008	-0.0598585
78344	2.35456	-0.0422147	2.63542	-0.0650229
78473	2.54032	-0.0510018	2.81842	-0.0521968
78613	2.3144	-0.0557243	2.59567	-0.0603896
78738	2.42239	-0.052111	2.71554	-0.0587652
78875	2.49068	-0.0488982	2.77337	-0.0605
79011	2.38898	-0.056377	2.68059	-0.0647727
79140	2.37015	-0.0502097	2.66755	-0.0556681
79275	2.46989	-0.0445701	2.7355	-0.056941
79405	2.47152	-0.0484091	2.7497	-0.0590525
79543	2.43831	-0.0520257	2.70525	-0.0561391
79679	2.50179	-0.0440722	2.79725	-0.0630162
79807	2.48143	-0.0440426	2.76609	-0.0658784
79946	2.46469	-0.0461045	2.75156	-0.0560637
80078	2.47492	-0.0392702	2.75218	-0.0575
80209	2.5381	-0.0543386	2.815	-0.0628043
80343	2.44727	-0.0416041	2.71261	-0.0642511
80474	2.46675	-0.0566656	2.74986	-0.0545163
80609	2.5792	-0.050642	2.85093	-0.0632299
80740	2.39651	-0.0545686	2.68292	-0.0519828
80875	2.41897	-0.0548604	2.70301	-0.062325
81015	2.58758	-0.0481326	2.86739	-0.0538702
81140	2.46365	-0.0515948	2.75625	-0.0702411
81275	2.35355	-0.0411895	2.64094	-0.056824
81417	2.56158	-0.035519	2.83841	-0.050911
81542	2.49447	-0.0445338	2.79268	-0.0609455
81677	2.31532	-0.0511498	2.60048	-0.0530568
81808	2.43992	-0.0499081	2.71761	-0.0598244
81941	2.47243	-0.056857	2.7515	-0.0641294
82083	2.33904	-0.059949	2.60931	-0.0595841
82209	2.38096	-0.0454633	2.6775	-0.0537014
82354	2.48765	-0.0447597	2.78272	-0.062234
82479	2.47997	-0.0420316	2.76889	-0.0541952
82608	2.35896	-0.0473985	2.66013	-0.061444
82748	2.44665	-0.0510406	2.72196	-0.0504396
82882	2.56545	-0.0512809	2.839	-0.0586956
83010	2.39054	-0.0542317	2.6852	-0.0569015
83149	2.33637	-0.0488487	2.62306	-0.0534502
83275	2.46212	-0.0456081	2.73452	-0.0531942
83412	2.40276	-0.0520026	2.68346	-0.0571366
83549	2.33487	-0.040443	2.62	-0.0590116
83677	2.40118	-0.0534173	2.68756	-0.0535714
83815	2.44736	-0.0544977	2.71534	-0.0551225
83949	2.4555	-0.0331705	2.73769	-0.05625
84078	2.35135	-0.047093	2.62861	-0.0578687
84219	2.37846	-0.0388374	2.66724	-0.0511364
84344	2.44239	-0.0479823	2.71518	-0.0593859
84479	2.36898	-0.0427583	2.65473	-0.0605097
84616	2.30381	-0.0487971	2.60118	-0.0542878
84743	2.4411	-0.0552632	2.72096	-0.0565962
84886	2.43914	-0.0517208	2.71682	-0.0572123
85015	2.35744	-0.041103	2.64375	-0.0515419
85145	2.38305	-0.0477185	2.6819	-0.0571231
85285	2.41958	-0.0522234	2.70375	-0.055243
85411	2.43512	-0.0515915	2.72093	-0.0594722
85550	2.33314	-0.0518433	2.60934	-0.0582746
85681	2.41515	-0.0522129	2.69387	-0.0538766
85811	2.51329	-0.0648677	2.78333	-0.0512115
85964	2.35762	-0.0567598	2.62171	-0.0564599
86078	2.33272	-0.047118	2.61	-0.052283
86216	2.55215	-0.0515898	2.81444	-0.0550037
86351	2.37032	-0.0507764	2.65547	-0.059081
86478	2.38972	-0.0488439	2.67917	-0.0503453
86619	2.48078	-0.0519737	2.77704	-0.0570076
86748	2.45371	-0.0556151	2.72096	-0.0574019
86882	2.36755	-0.0575107	2.66151	-0.0526376
87021	2.33217	-0.0375975	2.61707	-0.0627609
87145	2.3687	-0.049449	2.63459	-0.0564583
87282	2.41745	-0.0434862	2.69732	-0.0558374
87415	2.29519	-0.0531658	2.58112	-0.0631685
87549	2.34226	-0.0411032	2.61562	-0.0535036
87686	2.45094	-0.0458654	2.71213	-0.0475862
87819	2.32868	-0.0519139	2.60254	-0.0597933
87948	2.29749	-0.0460897	2.57518	-0.0565508
88090	2.37116	-0.04925	2.66106	-0.0578212
88215	2.4371	-0.0511124	2.70789	-0.0518443
88349	2.2108	-0.0529959	2.48257	-0.0542868
88486	2.26864	-0.0429916	2.57008	-0.0550385
88614	2.45603	-0.0494078	2.71641	-0.0569494
88757	2.30047	-0.0507929	2.57768	-0.0638415
88882	2.30413	-0.0515041	2.58944	-0.0587551
89017	2.48812	-0.0530034	2.7641	-0.0527473
89155	2.3567	-0.0477823	2.63072	-0.0504673
89281	2.35465	-0.0494299	2.63886	-0.0495466
89422	2.30893	-0.0427326	2.58202	-0.0628079
89550	2.25516	-0.0535181	2.53772	-0.0508452
89683	2.32456	-0.0311747	2.5971	-0.0556159
89824	2.30916	-0.057971	2.59068	-0.0539171
89949	2.28929	-0.0482143	2.57205	-0.0551948
90086	2.34251	-0.0547768	2.6108	-0.0557676
90222	2.36773	-0.0509923	2.64236	-0.0553279
90350	2.26897	-0.0434567	2.55938	-0.0517067
90489	2.36357	-0.0372191	2.64612	-0.0552205
90617	2.42246	-0.0520575	2.69297	-0.0575205
90753	2.21323	-0.0547959	2.48699	-0.0590703
90887	2.30989	-0.0439673	2.58435	-0.0544492
91016	2.34967	-0.0432497	2.61196	-0.0539809
91152	2.22502	-0.0533323	2.49739	-0.053373
91290	2.27403	-0.0531669	2.56989	-0.0585667
91421	2.36345	-0.0375	2.63968	-0.0506715
91554	2.27292	-0.0469347	2.56339	-0.0476786
91689	2.24229	-0.0512548	2.51335	-0.055732
91819	2.29427	-0.0507753	2.56907	-0.0503238
91960	2.2487	-0.0526541	2.53264	-0.0576586
92085	2.19288	-0.0508425	2.46375	-0.0578838
92224	2.21135	-0.0518466	2.47319	-0.0576014
92351	2.2873	-0.050868	2.5672	-0.0563623
92484	2.23803	-0.0422248	2.51645	-0.0586883
92626	2.17673	-0.0475169	2.459	-0.0555195
92753	2.23365	-0.0438949	2.49925	-0.0513916
92888	2.24778	-0.0368349	2.50739	-0.0549469
93024	2.14003	-0.054023	2.40515	-0.0448541
93152	2.15045	-0.0496591	2.43448	-0.0586538
93293	2.26481	-0.0513869	2.53969	-0.0577128
93421	2.15091	-0.0458383	2.4214	-0.0559132
93556	2.20703	-0.0426136	2.47882	-0.0636486
93689	2.28406	-0.0544229	2.56355	-0.0567878
93819	2.23158	-0.0534713	2.48727	-0.0652384
93957	2.09437	-0.0481936	2.35433	-0.0555902
94093	2.22832	-0.0384801	2.48407	-0.0494136
94223	2.1058	-0.0586737	2.36769	-0.0556579
94360	2.01792	-0.0450233	2.27262	-0.0555195
94492	2.25388	-0.0481783	2.51677	-0.0515086
94623	2.24122	-0.041411	2.50375	-0.0589286
94763	2.16392	-0.044186	2.43164	-0.0549086
94888	2.29885	-0.0351734	2.57236	-0.0548724
95023	2.22016	-0.039433	2.48504	-0.0523115
95159	2.15366	-0.0523089	2.42234	-0.0584677
95287	2.02207	-0.0388818	2.28462	-0.0564689
95430	2.14761	-0.0349732	2.42386	-0.0558122
95556	2.19351	-0.0487705	2.4391	-0.057874
95690	1.95773	-0.0559702	2.21388	-0.0590164
95828	2.13192	-0.0412819	2.3858	-0.0544301
95956	2.19014	-0.0573206	2.44953	-0.0596123
96096	2.04779	-0.0515424	2.31063	-0.0639344
96227	2.10921	-0.0496358	2.36706	-0.0547441
96356	2.19186	-0.0457849	2.44657	-0.0587028
96492	2.03178	-0.0391304	2.29696	-0.0523929
96623	2.12917	-0.0306496	2.37926	-0.0549694
96760	2.14723	-0.0466463	2.40577	-0.0549925
96891	2.09475	-0.0417929	2.34547	-0.0493094
97024	2.11266	-0.0447617	2.37883	-0.0536297
97162	2.05275	-0.0550935	2.30881	-0.0560801
97296	2.01391	-0.048522	2.26259	-0.0589704
97425	2.09149	-0.0538983	2.34809	-0.0614754
97564	2.10975	-0.0429699	2.36607	-0.0585937
97689	2.02374	-0.0451694	2.27531	-0.0642045
97825	2.15809	-0.0505361	2.41567	-0.0604736
97959	2.11748	-0.0412224	2.36095	-0.0502193
98095	2.00163	-0.0448287	2.26023	-0.0607741
98231	2.00101	-0.0381991	2.24464	-0.0543561
98357	2.01294	-0.0506175	2.26432	-0.0612957
98493	2.00599	-0.0508929	2.26601	-0.0577303
98633	1.99618	-0.0583861	2.24567	-0.0600871
98759	1.96233	-0.0531451	2.23333	-0.0579546
98894	2.07956	-0.040491	2.32623	-0.0565809
99025	1.92305	-0.048913	2.17428	-0.0693653
99158	1.8226	-0.0512953	2.06836	-0.0610879
99298	2.05363	-0.0492443	2.31161	-0.0552442
99426	1.88171	-0.0457786	2.13246	-0.0559654
99560	1.88221	-0.052038	2.13075	-0.0512695
99699	2.02598	-0.058277	2.26964	-0.0551128
99826	1.86467	-0.0525929	2.11667	-0.0582065
99966	1.92829	-0.0534536	2.175	-0.0582268
100098	1.99094	-0.0509892	2.24742	-0.0551887
100227	1.82385	-0.0487786	2.09449	-0.0613494
100362	1.9235	-0.0381426	2.16639	-0.0648897
100493	1.93527	-0.0528947	2.17541	-0.0571044
100630	1.7868	-0.0588515	2.03365	-0.0569293
100765	1.84202	-0.0448684	2.09441	-0.0559241
100896	1.9278	-0.0532567	2.17482	-0.0549385
101028	1.85273	-0.0569737	2.10482	-0.065625
101167	1.84653	-0.0480377	2.07893	-0.0551092
101296	1.90538	-0.0455056	2.14105	-0.0631954
101435	2.00575	-0.0545891	2.24172	-0.0552334
101560	1.84088	-0.0418997	2.08461	-0.0587304
101697	1.82295	-0.0467161	2.04649	-0.0548854
101834	1.91954	-0.0492318	2.15253	-0.0561649
101961	1.84286	-0.0456597	2.08787	-0.0599629
102101	1.73494	-0.0514908	1.98633	-0.0556802
102227	1.81387	-0.0557386	2.04971	-0.0552515
102363	1.94197	-0.0561831	2.16734	-0.0607317
102501	1.83088	-0.0518274	2.06349	-0.0563409
102629	1.69364	-0.0393099	1.93926	-0.0580592
102768	1.78524	-0.0468391	2.02312	-0.0608276
102900	1.88316	-0.0383011	2.11944	-0.0601562
103030	1.68817	-0.0521966	1.92784	-0.0565007
103181	1.69573	-0.0428035	1.92077	-0.0550043
103296	1.92666	-0.0518293	2.14805	-0.0572464
103432	1.88692	-0.048571	2.10798	-0.055233
103568	1.70357	-0.0401233	1.93711	-0.0608658
103698	1.78596	-0.0370253	2.01513	-0.0580548
103837	1.71382	-0.0459106	1.93733	-0.0524807
103965	1.62751	-0.0451619	1.84636	-0.0558755
104099	1.65014	-0.050073	1.87973	-0.065625
104238	1.59765	-0.0540416	1.83355	-0.0518692
104363	1.82479	-0.0444152	2.0476	-0.0605769
104500	1.67602	-0.0431567	1.90862	-0.052438
104637	1.54036	-0.0533024	1.76755	-0.0569712
104769	1.82735	-0.0437102	2.07213	-0.0595938
104904	1.82448	-0.056984	2.05125	-0.0575166
105030	1.55388	-0.049757	1.78895	-0.0625
105167	1.7658	-0.0446148	1.99243	-0.0587033
105304	1.81553	-0.0498665	2.0406	-0.0610227
105432	1.61369	-0.0322731	1.82788	-0.056528
105569	1.64636	-0.0414872	1.85625	-0.0546729
105698	1.71942	-0.0545297	1.9351	-0.0540155
105833	1.67056	-0.0607655	1.875	-0.059139
105973	1.57429	-0.0583726	1.79752	-0.0581498
106099	1.65962	-0.0553079	1.87172	-0.0516836
106234	1.68894	-0.0523732	1.89788	-0.0550043
106372	1.71061	-0.0458333	1.92922	-0.0575199
106499	1.59674	-0.0558151	1.80865	-0.0560874
106638	1.60227	-0.0390344	1.81274	-0.0497425
106770	1.76587	-0.0467637	1.97254	-0.0621429
106900	1.47388	-0.053813	1.69298	-0.0569402
107042	1.54509	-0.0513205	1.76016	-0.0543956
107167	1.70222	-0.0495828	1.91301	-0.0596739
107303	1.50098	-0.0560127	1.71902	-0.0557243
107438	1.52628	-0.0449251	1.74727	-0.0600162
107570	1.57797	-0.0525354	1.78455	-0.0600252
107708	1.66016	-0.0527439	1.86346	-0.0590909
107840	1.40625	-0.0514614	1.60824	-0.0634811
107970	1.53996	-0.0489251	1.75014	-0.0591721
108108	1.685	-0.0479508	1.89589	-0.0642207
108233	1.53034	-0.0468348	1.73125	-0.0508475
108372	1.56175	-0.0477181	1.76646	-0.0584101
108507	1.59818	-0.0497182	1.80056	-0.0559955
108635	1.39434	-0.0635081	1.60405	-0.0628107
108775	1.4338	-0.0416324	1.64423	-0.0631552
108900	1.5645	-0.0545407	1.77424	-0.0575153
109037	1.4148	-0.0567326	1.61061	-0.0613636
109173	1.38496	-0.0551261	1.59443	-0.0591721
109303	1.50824	-0.0503209	1.71716	-0.0644153
109441	1.51785	-0.0555493	1.70763	-0.0598852
109573	1.38193	-0.060807	1.58467	-0.0627907
109703	1.43438	-0.0490232	1.62888	-0.0533257
109845	1.48183	-0.0465572	1.6875	-0.0511029
109970	1.4104	-0.0523775	1.59911	-0.0665816
110104	1.31059	-0.038994	1.51386	-0.0619982
110241	1.36214	-0.064047	1.57108	-0.0610259
110371	1.53033	-0.0553427	1.70866	-0.0577577
110510	1.40975	-0.0563312	1.61159	-0.0566005
110637	1.32484	-0.0416327	1.5325	-0.06
110771	1.35777	-0.0579422	1.54768	-0.0540075
110911	1.38194	-0.0512558	1.57902	-0.0634134
111036	1.26346	-0.0498662	1.45768	-0.0573596
111173	1.24547	-0.0597808	1.44271	-0.0707289
111308	1.38608	-0.050625	1.58373	-0.0612692
111436	1.42254	-0.0546477	1.60437	-0.0550658
111578	1.229	-0.0487194	1.42964	-0.0530268
111705	1.31799	-0.0452586	1.5067	-0.0644247
111841	1.38456	-0.0503812	1.58718	-0.0574122
111974	1.27856	-0.052034	1.4768	-0.0601396
112104	1.1755	-0.051024	1.36534	-0.0596675
112243	1.3542	-0.0474457	1.54471	-0.0620516
112373	1.45665	-0.0585598	1.65419	-0.0651454
112507	1.21226	-0.056422	1.3864	-0.0599561
112641	1.29666	-0.042945	1.47865	-0.0520799
112771	1.38385	-0.065404	1.57236	-0.0679455
112908	1.15238	-0.0422229	1.35094	-0.0503731
113045	1.20888	-0.0385909	1.39117	-0.0607701
113173	1.37973	-0.0587903	1.57345	-0.0549198
113311	1.18031	-0.0582792	1.36064	-0.0638221
113445	1.33225	-0.0492552	1.51063	-0.0541667
113575	1.39658	-0.055178	1.57763	-0.0637145
113715	1.24238	-0.0438373	1.42077	-0.063417
113840	1.24238	-0.0438373	1.42077	-0.063417
114090	1.27078	-0.0514734	1.45902	-0.0509267
114210	1.11228	-0.0439706	1.2875	-0.0624582
114341	1.24169	-0.0538344	1.4285	-0.0584559
114475	1.32341	-0.0545089	1.48597	-0.0606208
114612	1.16542	-0.0482665	1.35089	-0.0553963
114740	1.14843	-0.0485236	1.34489	-0.0496205
114881	1.37739	-0.0480583	1.55354	-0.0557355
115014	1.1565	-0.0532241	1.3297	-0.060533
115142	1.11224	-0.0510064	1.27917	-0.05625
115281	1.34192	-0.0506772	1.50863	-0.0652048
115407	1.34845	-0.0489618	1.50021	-0.0632163
115545	1.02856	-0.0622953	1.2091	-0.0526042
115676	1.20662	-0.0548544	1.37875	-0.0602441
115809	1.43934	-0.0478662	1.59646	-0.0617131
115948	1.04552	-0.0482429	1.23091	-0.0591848
116081	1.05166	-0.0483524	1.23125	-0.0473601
116211	1.23805	-0.0496676	1.41454	-0.0534992
116350	1.18398	-0.0501767	1.34048	-0.0604093
116475	0.896764	-0.0507825	1.06064	-0.0496212
116611	1.12915	-0.0408449	1.28736	-0.0546196
116751	1.29943	-0.0558775	1.46132	-0.0631052
116880	1.05991	-0.0545265	1.22527	-0.0615306
117016	1.01274	-0.0458924	1.18803	-0.0639257
117142	1.20885	-0.0474587	1.37396	-0.0527706
117277	1.12017	-0.0378472	1.29375	-0.0549735
117414	0.874619	-0.0481662	1.02533	-0.0509434
117544	0.995457	-0.0467351	1.14967	-0.046875
117683	1.08147	-0.0389474	1.23255	-0.0551717
117815	1.00796	-0.0492829	1.16577	-0.0663462
117943	0.905156	-0.0518409	1.05938	-0.0596003
118081	1.04648	-0.0366134	1.2191	-0.051366
118211	1.06597	-0.0460292	1.21446	-0.0586538
118348	0.992949	-0.0517094	1.13519	-0.0595681
118483	0.988257	-0.0571573	1.13063	-0.0586714
118611	0.987853	-0.0424719	1.11771	-0.0557971
118750	1.09031	-0.0431573	1.23998	-0.0582972
118884	0.87961	-0.0641815	1.02269	-0.0537457
119014	0.855249	-0.044609	1.00781	-0.0494343
119152	1.13597	-0.0432692	1.27677	-0.0520647
119277	0.869092	-0.0590802	1.00304	-0.0616525
119415	0.802769	-0.0422845	0.952841	-0.0591495
119552	1.12976	-0.0439126	1.26472	-0.0481452
119681	0.955118	-0.0558225	1.1022	-0.0530431
119819	0.838066	-0.0513091	0.986384	-0.0567537
119945	0.92632	-0.0448202	1.07014	-0.0559028
120082	0.980154	-0.0305331	1.12557	-0.0570206
120221	0.804375	-0.0480355	0.943887	-0.06336
120347	0.778675	-0.033485	0.91875	-0.0578674
120482	0.814752	-0.0534574	0.962109	-0.0529975
120618	0.912638	-0.047048	1.02515	-0.05625
120747	0.821035	-0.0587072	0.969415	-0.0555843
120889	0.880877	-0.0480952	1.01581	-0.05
121014	0.912397	-0.0500673	1.0412	-0.0493534
121148	0.889418	-0.056188	1.01993	-0.0475106
121285	0.836973	-0.0451271	0.96875	-0.0593096
121414	0.733421	-0.0392442	0.87627	-0.0526878
121555	0.864738	-0.0472176	0.996635	-0.0551599
121686	0.874745	-0.0568082	0.992647	-0.0593617
121815	0.73016	-0.0573851	0.868106	-0.0563272
121956	0.812901	-0.0522619	0.936885	-0.0590719
122081	0.945	-0.055763	1.05852	-0.0552165
122218	0.856547	-0.0523625	0.958836	-0.0543471
122348	0.75961	-0.0516852	0.885938	-0.0625417
122483	0.900853	-0.0542244	1.0125	-0.0533385
122620	0.833635	-0.0492443	0.9675	-0.0582268
122755	0.748002	-0.0524457	0.876838	-0.0546101
122884	0.665826	-0.0597833	0.792223	-0.05546
123023	0.69179	-0.0520416	0.803387	-0.0575548
123148	0.777807	-0.0513799	0.903612	-0.0572666
123284	0.660881	-0.0493838	0.780577	-0.0567692
123417	0.673471	-0.0418642	0.803977	-0.060898
123549	0.812053	-0.0506757	0.925568	-0.0554454
123684	0.650295	-0.0414172	0.735469	-0.0554528
123815	0.595263	-0.0501359	0.707386	-0.0591825
123951	0.777168	-0.0560929	0.881633	-0.0538043
124092	0.570945	-0.0504258	0.687736	-0.058315
124217	0.667781	-0.03795	0.786607	-0.0558533
124355	0.665625	-0.0430102	0.773306	-0.0456455
124483	0.521034	-0.047093	0.637318	-0.0608696
124618	0.644883	-0.0386719	0.737171	-0.0508382
124754	0.648995	-0.0521512	0.760855	-0.0519971
124884	0.557333	-0.0482448	0.666667	-0.0563263
125019	0.560068	-0.0402091	0.668092	-0.0565651
125156	0.65625	-0.0427523	0.776042	-0.0543036
125284	0.565244	-0.0452888	0.677482	-0.0552406
125424	0.439023	-0.0533342	0.550658	-0.0580301
125558	0.585032	-0.0454908	0.688184	-0.0518996
125685	0.663779	-0.0393665	0.761181	-0.0666979
125826	0.530511	-0.0590522	0.627039	-0.0543159
125951	0.544008	-0.0455383	0.649632	-0.0546898
126088	0.676009	-0.0410795	0.774831	-0.0590112
126223	0.47638	-0.0542614	0.581951	-0.0510193
126355	0.406192	-0.0426958	0.490809	-0.0533405
126488	0.510334	-0.0505314	0.603355	-0.0576304
126625	0.602519	-0.043969	0.708962	-0.0496563
126754	0.421311	-0.0527256	0.518412	-0.0569295
126893	0.42079	-0.053027	0.513971	-0.0627273
127018	0.676488	-0.0504464	0.782478	-0.0554794
127154	0.514834	-0.05809	0.602386	-0.0540865
127292	0.384727	-0.0484375	0.470673	-0.0549618
127421	0.584539	-0.044677	0.678823	-0.0618076
127559	0.549933	-0.0400445	0.640424	-0.0584165
127685	0.375165	-0.0496807	0.470346	-0.061809
127822	0.4441	-0.0428216	0.5401	-0.0520161
127960	0.480163	-0.0454387	0.566902	-0.0598101
128087	0.35421	-0.0488518	0.452596	-0.061954
128226	0.422725	-0.0497826	0.516595	-0.0509824
128359	0.365667	-0.0592966	0.455921	-0.0673807
128488	0.417496	-0.0495355	0.487325	-0.0555536
128629	0.416446	-0.0461921	0.492332	-0.0514992
128755	0.274585	-0.0515678	0.36538	-0.0623269
128890	0.417618	-0.0417698	0.489583	-0.0560223
129026	0.413307	-0.0525992	0.495479	-0.0605222
129157	0.25712	-0.0528973	0.334076	-0.0539928
129295	0.323608	-0.0461643	0.41402	-0.0623008
129423	0.441964	-0.0393626	0.523558	-0.0555676
129558	0.154934	-0.0378	0.2385	-0.0650995
129690	0.368222	-0.0456941	0.455819	-0.0565108
129821	0.377918	-0.0568651	0.450507	-0.0647906
129958	0.257119	-0.0502023	0.346023	-0.0649922
130095	0.385985	-0.0490345	0.470089	-0.0591964
130228	0.30802	-0.0521442	0.382863	-0.0579866
130363	0.290096	-0.0314029	0.367279	-0.0636542
130488	0.286767	-0.0518119	0.359375	-0.0644978
130626	0.206987	-0.041087	0.282514	-0.0559615
130763	0.213073	-0.0337772	0.303488	-0.0524881
130891	0.253646	-0.0452967	0.331457	-0.054375
131028	0.1312	-0.0422489	0.215341	-0.062479
131162	0.225529	-0.0497093	0.304209	-0.0579942
131292	0.368315	-0.0518744	0.450507	-0.0532186
131432	0.0863669	-0.0524766	0.137045	-0.056794
131558	0.235266	-0.0475746	0.310967	-0.0566379
131692	0.362981	-0.0445955	0.434013	-0.0648551
131830	0.132268	-0.0579923	0.194429	-0.0594874
131957	0.155362	-0.0444679	0.223185	-0.0561693
132098	0.324531	-0.0534468	0.38475	-0.0602237
132224	0.151089	-0.0612152	0.208456	-0.0578864
132359	0.21125	-0.0407953	0.25684	-0.0576072
132500	0.207853	-0.0524768	0.254215	-0.0618842
132624	0.149657	-0.0495719	0.216538	-0.0545515
132762	0.286199	-0.0524428	0.335011	-0.0539384
132896	0.104923	-0.0506089	0.158523	-0.0649101
133024	0.149911	-0.0575969	0.21396	-0.0592683
133167	0.287549	-0.0481948	0.347368	-0.0625
133293	0.104589	-0.0499004	0.146604	-0.0593974
133428	0.0219252	-0.0428647	0.0930682	-0.0514925
133562	0.175173	-0.0466243	0.227961	-0.06075
133691	0.0829706	-0.0466292	0.12375	-0.0541939
133830	-0.100623	-0.0491909	-0.0661184	-0.0630744
133961	0.123902	-0.0517562	0.179637	-0.0572545
134094	0.152451	-0.0556397	0.201766	-0.0583068
134229	-0.0513912	-0.0513674	-0.00803571	-0.0626883
134359	0.0815018	-0.0516258	0.113918	-0.055564
134497	0.170343	-0.0573765	0.215074	-0.0656855
134634	0.0262987	-0.0542506	0.0736364	-0.057862
134762	0.0861429	-0.0449171	0.13275	-0.0539201
134899	0.123658	-0.0601215	0.169898	-0.0483629
135033	-0.110417	-0.0285484	-0.0672013	-0.0619462
