# Supplementary material for: Cell cycle and age-related modulations of mouse chromosome stiffness
Source: eLife. 2025 Apr 14;13:RP97403. doi: 10.7554/eLife.97403 (PMC11996174; doi:10.7554/eLife.97403)
Supplement: Figure 1—figure supplement 1—source data 2. [file elife-97403-fig1-figsupp1-data2.xlsx]

## Sheet: Figure 1-figure supplement 1 ri
Figure 1-figure supplement 1 right panel Souce Data 1
time(millisecond)	stiff pipette X-axis(micrometer)	stiff pipette Y-axis(micrometer)	force pipette X-axis(micrometer)	force pipette Y-axis(micrometer)
0	0.09225	-0.0310345	0.017589	-0.0574351
137	0.0925403	0.0133929	0.0310471	-0.0590677
268	0.0144643	-0.028125	-0.020271	-0.056436
403	0.0136824	-0.0346154	0.0021668	-0.0563845
540	0.0803571	-0.0414474	0.0199766	-0.0574651
668	-0.00193965	-0.05625	-0.0192247	-0.058245
802	-0.0875	-0.0414474	-0.0686372	-0.0575302
935	0.0609375	-0.0539063	0.00085226	-0.0583807
1070	0.0421875	-0.0521341	-0.0150456	-0.0555229
1208	-0.05175	-0.035	-0.0349712	-0.0573407
1335	0.09	-0.0467308	0.024366	-0.0576402
1473	0.0401786	-0.0675	-0.00946101	-0.0569912
1609	-0.0464674	-0.0435484	-0.0525207	-0.0568609
1737	0.152679	-0.0219512	0.0483916	-0.0558894
1874	0.084375	-0.0294643	-0.00715909	-0.0591938
2002	-0.0198529	-0.0409091	-0.0399872	-0.0589138
2136	0.219375	-0.0359043	0.0855431	-0.0561173
2276	0.1575	-0.0177631	0.00692307	-0.056064
2405	-0.0231618	-0.0384146	-0.059422	-0.0560424
2542	0.33125	-0.0453947	0.0811875	-0.0544407
2670	0.265179	-0.0535061	0.0431006	-0.0589367
2803	0.126562	-0.0421875	0.0332474	-0.0557374
2943	0.24375	0.00681818	0.081535	-0.0555041
3072	0.39375	-0.0384868	0.116561	-0.0552414
3206	0.162132	-0.0414474	0.0993055	-0.0569206
3337	0.21375	-0.0529412	0.099573	-0.0555959
3471	0.180804	-0.0255682	0.0899634	-0.056816
3611	0.110417	-0.034375	0.0499884	-0.0574074
3739	0.0773437	-0.0546429	0.0411411	-0.0582402
3871	0.06875	-0.046875	0.00617271	-0.0573407
4010	0.0819643	-0.0482143	0.00730634	-0.0575495
4138	0.116016	-0.039527	0.0409091	-0.0581879
4274	0.110893	-0.0632812	0.028125	-0.0565517
4412	0.04375	-0.0653226	0.0139741	-0.0554281
4538	0.16875	-0.0596939	0.0708112	-0.0574356
4677	0.10875	-0.0308468	0.0628928	-0.0571663
4805	0.0827206	-0.0585	0.0314224	-0.0579832
4940	0.05625	-0.05	0.0623194	-0.0554926
5080	0.155515	-0.0552273	0.0568929	-0.0570298
5206	0.121875	-0.0488208	0.0322777	-0.05609
5344	0.102802	-0.0321429	0.023689	-0.0578602
5473	0.178977	-0.0460227	0.0566753	-0.0569634
5608	0.127841	-0.0482143	0.0308587	-0.0562756
5746	0.0953804	-0.0257143	0.00986538	-0.057043
5875	0.25625	-0.0116379	0.084375	-0.0577486
6009	0.207422	-0.05625	0.0185756	-0.0566929
6148	0.105882	-0.0325	0.00823599	-0.0580138
6277	0.230114	-0.047093	0.0675201	-0.0562228
6415	0.16875	-0.0441177	0.0160335	-0.057766
6547	0.0380068	-0.0527344	-0.0245572	-0.0581807
6676	0.186513	-0.042	0.00974545	-0.0565903
6816	0.0904891	-0.0360849	-0.0541933	-0.0567628
6944	0.0991071	-0.036	-0.0306312	-0.0565233
7079	0.176786	-0.050266	-0.00979393	-0.0571343
7210	0.10125	-0.065625	-0.0684826	-0.0561707
7343	0.1575	-0.0454327	0.00319701	-0.057876
7478	0.3375	-0.0664773	0.0262253	-0.055648
7612	0.0328125	-0.0375	-0.0842322	-0.0571498
7745	0.21375	-0.0534375	0.0315773	-0.056224
7882	0.34875	-0.0261628	0.046559	-0.05625
8011	0.0997984	-0.0495	-0.0273214	-0.0589831
8151	0.148897	-0.0463235	0.0310855	-0.0579192
8279	0.460417	-0.05	0.11547	-0.0532866
8413	0.114583	-0.0622768	-0.00791152	-0.0558136
8549	0.154687	-0.0424528	0.0628677	-0.0570365
8678	0.334539	-0.005625	0.0940444	-0.058434
8813	0.152679	-0.045	0.0074884	-0.0558692
8952	0.137716	-0.05625	0.0424622	-0.058211
9080	0.148897	-0.0385274	0.0372741	-0.0565423
9218	0.183266	-0.045	0.0267141	-0.055419
9346	0.216346	-0.0535194	0.0780363	-0.0568299
9480	0.13125	-0.04375	0.0399802	-0.0575231
9616	0.133224	-0.0344758	0.0585893	-0.058718
9747	0.22725	-0.0610169	0.0918602	-0.05625
9880	0.25875	-0.0390306	0.0874797	-0.0573551
10013	0.09675	-0.0434659	0.027617	-0.0592975
10149	0.198355	-0.0521341	0.0775862	-0.0582328
10281	0.28125	-0.0375	0.0894525	-0.0593143
10413	0.251645	-0.0406915	0.0939269	-0.0574252
10547	0.156908	-0.0642857	0.0566698	-0.0578427
10687	0.40725	-0.0484615	0.141095	-0.0567961
10815	0.39375	-0.0515625	0.131903	-0.0569979
10952	0.192434	0.0206633	0.0659274	-0.0572433
11085	0.139402	-0.0404297	0.0931352	-0.0586453
11214	0.445312	-0.0479779	0.16568	-0.0564889
11348	0.12375	-0.0355263	0.0229829	-0.0562248
11482	0.0150915	-0.0537313	0.0303901	-0.0575
11616	0.36	-0.0400424	0.131847	-0.0608288
11754	0.225	-0.0365625	0.0814784	-0.0581461
11881	0.1375	-0.0511364	0.0744398	-0.0582667
12021	0.429276	-0.0340909	0.192085	-0.0568936
12150	0.420221	-0.0649038	0.134091	-0.0570467
12283	0.241071	-0.0368853	0.162382	-0.0541529
12420	0.470724	-0.0375	0.21432	-0.0576923
12549	0.4125	-0.0351563	0.20385	-0.0575012
12682	0.196875	-0.0445313	0.147535	-0.0563882
12822	0.367279	-0.0466071	0.230146	-0.0573486
12951	0.35	-0.0457849	0.197289	-0.0586584
13088	0.28125	-0.0466981	0.188928	-0.0566142
13216	0.23625	-0.0275943	0.192738	-0.0559583
13349	0.359135	-0.0363971	0.19706	-0.0575779
13490	0.265179	-0.0660326	0.191631	-0.0563548
13618	0.263942	-0.0575581	0.198664	-0.0566275
13751	0.276359	-0.0613636	0.195624	-0.0554033
13883	0.383523	-0.0581897	0.241176	-0.0583848
14017	0.34125	-0.01875	0.23301	-0.0566111
14156	0.28875	-0.0857143	0.23334	-0.0593598
14285	0.514286	-0.046875	0.304016	-0.0580038
14417	0.342614	-0.0461066	0.244055	-0.0574356
14556	0.347426	-0.0380282	0.274087	-0.0576549
14684	0.418207	-0.055	0.306801	-0.0558628
14823	0.402083	-0.0329268	0.281675	-0.0589187
14956	0.222039	-0.027	0.25416	-0.0592401
15084	0.30625	-0.0389423	0.25731	-0.0566827
15223	0.43875	-0.0389423	0.317977	-0.0560624
15351	0.31875	-0.0525	0.272123	-0.0560877
15487	0.421875	-0.055538	0.320325	-0.0572669
15623	0.455114	-0.0660714	0.344508	-0.058306
15752	0.475962	-0.0428571	0.349672	-0.0563577
15892	0.440625	-0.0244565	0.351959	-0.0578417
16025	0.461932	-0.00843751	0.375774	-0.0568059
16153	0.471635	-0.09375	0.403441	-0.0596639
16290	0.452446	-0.028125	0.373909	-0.0572804
16419	0.365625	-0.0454327	0.367727	-0.0570485
16554	0.30375	-0.053125	0.350319	-0.0589952
16688	0.45675	-0.06	0.385481	-0.0571111
16823	0.33	-0.0628676	0.339366	-0.0583531
16957	0.413839	-0.0321429	0.367141	-0.0586305
17092	0.50625	-0.0508065	0.429646	-0.0575495
17220	0.460417	-0.0592105	0.414043	-0.0577604
17360	0.428365	-0.0428571	0.42894	-0.0572843
17487	0.542411	0.0225	0.45864	-0.0575829
17623	0.447917	-0.0428571	0.454018	-0.0593795
17754	0.328618	-0.0390306	0.426626	-0.0589522
17887	0.39375	-0.0346154	0.43886	-0.0580983
18027	0.43425	-0.05625	0.446844	-0.0573582
18155	0.3375	-0.05	0.381133	-0.0576245
18289	0.354044	-0.0482143	0.40663	-0.0582026
18426	0.50625	-0.046875	0.454285	-0.0572926
18554	0.48375	-0.0471774	0.45854	-0.0575012
18694	0.40625	-0.039527	0.452826	-0.0584821
18828	0.6875	-0.0538043	0.557173	-0.0575331
18955	0.61875	-0.046875	0.56511	-0.0587937
19089	0.43125	-0.0488208	0.523772	-0.0590437
19222	0.592105	-0.039527	0.591163	-0.0582983
19357	0.59175	-0.0458333	0.56432	-0.0553487
19491	0.413603	-0.0527344	0.544178	-0.0585422
19625	0.525	-0.0541667	0.576798	-0.057494
19761	0.598897	-0.045	0.579135	-0.0583923
19895	0.445884	-0.0436225	0.539425	-0.0580595
20024	0.519485	0.0160714	0.587769	-0.0580822
20162	0.70125	-0.028125	0.63139	-0.0577688
20289	0.58125	-0.0304054	0.575349	-0.0575607
20426	0.55625	0.016875	0.631181	-0.0576609
20563	0.802303	-0.0571154	0.677272	-0.0570676
20695	0.597656	0.0460227	0.624138	-0.0582504
20830	0.5625	-0.0723214	0.664035	-0.0574087
20957	0.7875	-0.0553846	0.729379	-0.0589023
21090	0.667969	-0.0636792	0.67627	-0.0571997
21231	0.570536	-0.0484914	0.699704	-0.0581812
21359	0.73125	-0.01875	0.750321	-0.0575216
21497	0.653365	-0.0649038	0.703802	-0.0604117
21629	0.560685	-0.0575	0.730582	-0.058133
21757	0.662946	-0.0546875	0.74629	-0.0593961
21897	0.73125	-0.0625	0.770689	-0.0579244
22026	0.62625	-0.04875	0.754486	-0.0570205
22160	0.599185	-0.0479167	0.76063	-0.0586634
22297	0.73125	0.0375	0.784512	-0.0583902
22426	0.75375	-0.018	0.787147	-0.0574526
22566	0.559821	-0.0461538	0.756888	-0.0567737
22699	0.61875	-0.040625	0.765809	-0.057773
22826	0.745924	-0.00750001	0.802596	-0.0581808
22964	0.691544	-0.01875	0.772241	-0.0551623
23092	0.625	-0.0193965	0.761765	-0.0567931
23228	0.76275	-0.02625	0.792128	-0.0569493
23361	0.847768	-0.0597656	0.843078	-0.0556078
23497	0.683036	-0.0302885	0.794475	-0.0571402
23632	0.68625	-0.0543103	0.817592	-0.0574049
23765	0.860625	-0.0602679	0.891353	-0.0568543
23893	0.692308	-0.0375	0.839933	-0.0575446
24034	0.782812	-0.0365625	0.86263	-0.0572444
24161	0.759375	-0.0708333	0.851168	-0.0566365
24298	0.636058	-0.0544355	0.815723	-0.0591735
24428	0.725893	-0.0452922	0.848446	-0.0585894
24560	0.703125	-0.0384146	0.833216	-0.0575761
24696	0.54225	-0.03825	0.793421	-0.0578246
24829	0.79875	-0.0473684	0.866783	-0.0568681
24961	0.817279	-0.0421875	0.877973	-0.0589599
25100	0.58275	-0.05625	0.824464	-0.0566794
25229	0.7875	-0.0118421	0.932821	-0.059085
25368	0.87975	-0.0526596	0.897664	-0.0570346
25500	0.70625	0	0.902083	-0.0577296
25628	0.652083	-0.0238636	0.888116	-0.0586725
25763	0.949632	-0.0541667	0.982841	-0.0571721
25896	0.7875	-0.0421875	0.91053	-0.0551369
26030	0.644153	-0.0659483	0.87499	-0.0571437
26164	0.985598	-0.0642857	1.02623	-0.0580713
26298	0.964904	-0.0542647	0.988929	-0.0570294
26435	0.741477	-0.0647727	0.929698	-0.0582186
26569	0.889583	-0.0796875	1.02018	-0.0578617
26697	1.10625	-0.0444767	1.07936	-0.055131
26835	0.896691	-0.0484177	1.04082	-0.0560339
26963	0.91125	-0.055	1.03609	-0.0559869
27098	1.07467	-0.0519231	1.1164	-0.0564794
27231	1.03125	-0.0192857	1.08836	-0.0567606
27364	0.89375	-0.05625	1.0694	-0.0552528
27501	0.975815	-0.0570652	1.11482	-0.0578251
27630	0.992647	-0.0539384	1.12589	-0.0550487
27764	0.84375	-0.0430556	1.08238	-0.0557314
27903	0.940179	-0.0399194	1.14265	-0.0568765
28032	0.894375	-0.0208333	1.11594	-0.0556347
28169	0.774519	-0.0399194	1.08218	-0.0587717
28302	0.989338	-0.04125	1.16964	-0.055347
28431	1.0125	-0.0532895	1.14274	-0.0562244
28571	0.802303	-0.0484615	1.10355	-0.0589336
28699	0.97875	-0.0463235	1.17301	-0.0564871
28831	1.1519	-0.0375	1.23564	-0.0576455
28971	0.863315	-0.0520833	1.09277	-0.05617
29100	0.98125	-0.05625	1.23143	-0.057284
29239	1.14	-0.0394737	1.24939	-0.0564617
29367	0.945	-0.0444767	1.1497	-0.0567501
29498	0.89775	-0.0425	1.18751	-0.0573014
29634	1.24875	-0.0207237	1.25975	-0.0546096
29766	0.908036	-0.0521739	1.1452	-0.0555147
29901	0.871875	-0.0486486	1.15378	-0.057691
30033	1.11956	-0.0370588	1.29305	-0.0563538
30166	1.00547	-0.0204545	1.20275	-0.0559569
30300	0.905114	-0.0501923	1.21131	-0.0590002
30433	1.13906	-0.043125	1.31214	-0.0559254
30568	1.09018	-0.045	1.28819	-0.0559724
30705	0.92925	-0.0411972	1.2486	-0.0552678
30833	1.13365	-0.0542169	1.36383	-0.0560696
30971	1.2	-0.0470149	1.37032	-0.0552623
31106	0.995192	-0.0441964	1.30781	-0.0557118
31235	1.14609	0.00535714	1.41657	-0.0569838
31372	1.14375	-0.0507042	1.38326	-0.0568421
31500	1.04429	-0.0436567	1.34377	-0.0578132
31634	0.9375	-0.0325658	1.34707	-0.0572635
31774	1.23268	-0.0426136	1.44333	-0.0575359
31902	1.11766	-0.00865384	1.39338	-0.057595
32040	1.02138	-0.0375	1.37021	-0.0568354
32168	1.18687	-0.045	1.45588	-0.0577635
32301	1.24375	-0.0318396	1.47328	-0.0578708
32441	1.05075	-0.0473684	1.43037	-0.058435
32569	1.10475	0.0264706	1.45887	-0.0581757
32703	1.33125	-0.0456522	1.53902	-0.0565594
32835	1.125	-0.0417857	1.47256	-0.0563012
32972	1.06313	-0.0474398	1.47025	-0.0574382
33103	1.22727	-0.0390306	1.54225	-0.0576588
33242	1.15875	-0.0148585	1.50837	-0.0571862
33371	1.16658	-0.047093	1.53199	-0.0572907
33508	1.27644	-0.0340116	1.56021	-0.0560011
33636	1.24375	-0.0419492	1.54501	-0.0577649
33774	1.16394	-0.0485294	1.54373	-0.0576543
33905	1.4261	-0.031875	1.59903	-0.0577222
34038	1.26562	-0.0472826	1.5566	-0.0565754
34175	1.1025	-0.0375	1.51535	-0.058498
34303	1.42031	-0.054	1.65133	-0.0584752
34438	1.41161	-0.0460843	1.60148	-0.058295
34577	1.07578	-0.0549716	1.52798	-0.0556611
34706	1.29937	-0.0460227	1.64454	-0.0590114
34843	1.47548	-0.0535714	1.70758	-0.0583578
34971	1.23239	-0.0490909	1.60284	-0.057004
35105	1.1375	-0.04375	1.62011	-0.0583218
35244	1.57902	-0.04375	1.78436	-0.0582033
35371	1.27969	-0.0311538	1.64778	-0.0584257
35505	1.16719	-0.0431507	1.62154	-0.0593595
35645	1.43958	-0.0345	1.70754	-0.0567235
35773	1.47375	-0.0536538	1.69846	-0.0570495
35912	1.17675	-0.0388636	1.62992	-0.0575123
36043	1.44844	-0.0602679	1.71963	-0.0591399
36172	1.4752	-0.0536538	1.72684	-0.0576045
36312	1.26875	-0.025	1.66602	-0.0581376
36440	1.36875	-0.0318396	1.73691	-0.0587819
36575	1.48359	-0.0444767	1.74047	-0.0581661
36706	1.31875	-0.0495763	1.70063	-0.0597899
36839	1.3625	-0.0427817	1.72829	-0.0594281
36979	1.46625	-0.0457031	1.77271	-0.0602642
37107	1.44375	-0.0421875	1.77511	-0.0581133
37241	1.44474	-0.046875	1.79039	-0.0583887
37379	1.53059	-0.0569277	1.83683	-0.059375
37506	1.4625	-0.0392442	1.81209	-0.0574367
37646	1.46719	-0.0316901	1.82713	-0.0607026
37780	1.50625	-0.0547697	1.82925	-0.0593125
37908	1.55504	-0.036	1.87622	-0.0569791
38046	1.46832	-0.0225	1.84335	-0.0561178
38174	1.55754	-0.0389423	1.89534	-0.0572917
38308	1.57232	-0.05625	1.92501	-0.0580152
38448	1.44716	-0.0516393	1.8749	-0.0564838
38576	1.47962	-0.0369141	1.88671	-0.0582213
38713	1.5392	-0.0444079	1.92113	-0.0593354
38841	1.56094	-0.04375	1.92135	-0.0579735
38975	1.45668	-0.0498418	1.87951	-0.0596918
39111	1.55724	-0.0446918	1.94038	-0.056908
39243	1.65825	-0.0375	1.95932	-0.0575849
39375	1.59911	-0.0663462	1.92576	-0.0567966
39513	1.59375	-0.039375	1.96783	-0.0587231
39645	1.76106	-0.04375	2.00676	-0.0558206
39781	1.65469	-0.0397866	1.96897	-0.0563037
39914	1.62533	-0.0375	1.99455	-0.058278
40042	1.69554	-0.04725	2.02935	-0.0585532
40179	1.60022	-0.0646875	1.9973	-0.057613
40309	1.66982	-0.0495	2.06155	-0.0564315
40447	1.66705	-0.0465517	2.0475	-0.0562759
40581	1.51042	-0.0393072	2.00041	-0.0565146
40709	1.62375	-0.0246951	2.08947	-0.0597574
40843	1.66042	-0.0140625	2.0635	-0.0589483
40978	1.5075	-0.0301829	2.0102	-0.0578012
41111	1.63125	-0.0362903	2.09177	-0.0608392
41248	1.67143	-0.0406915	2.08033	-0.05625
41377	1.52853	-0.02025	2.02608	-0.0597506
41517	1.66641	-0.0530172	2.12031	-0.0583726
41650	1.71458	-0.03625	2.12346	-0.0573466
41779	1.575	-0.0636513	2.05951	-0.058566
41913	1.69261	-0.02025	2.15656	-0.0576615
42044	1.77443	-0.0242647	2.15357	-0.0573252
42178	1.60757	-0.0122283	2.11043	-0.0558087
42317	1.69875	-0.0397059	2.15451	-0.0569451
42447	1.7731	-0.0385714	2.20428	-0.0562757
42583	1.6	-0.0426136	2.11863	-0.0596828
42717	1.71042	-0.039375	2.19417	-0.0585
42845	1.7642	-0.0435484	2.20603	-0.0597872
42981	1.69375	-0.0413603	2.16621	-0.0586152
43113	1.70625	-0.0375	2.20492	-0.0583821
43247	1.78977	-0.05	2.22005	-0.0588766
43384	1.64732	-0.0544355	2.20514	-0.0562003
43513	1.71414	-0.0384146	2.21538	-0.0586819
43653	1.71563	-0.0446121	2.22278	-0.0581333
43781	1.68505	-0.0155172	2.23661	-0.0573969
43914	1.79375	-0.03	2.26347	-0.0581948
44064	1.70775	-0.05625	2.22857	-0.0577799
44180	1.675	-0.0267857	2.23594	-0.0571655
44319	1.84301	-0.0341518	2.30315	-0.0575296
44453	1.75	-0.041129	2.23714	-0.0571747
44580	1.69046	-0.0505435	2.25125	-0.058149
44718	1.76625	-0.0246951	2.26042	-0.057113
44848	1.81125	-0.0265909	2.261	-0.0569062
44982	1.62533	-0.0585	2.23442	-0.0579362
45122	1.71964	-0.0370427	2.29789	-0.0587583
45248	1.78642	-0.0333333	2.29412	-0.0584185
45386	1.8	-0.0397866	2.28191	-0.0587205
45521	1.69554	0.0127841	2.31919	-0.0581223
45649	1.77188	-0.0261161	2.32158	-0.0593475
45784	1.80562	-0.0327273	2.33524	-0.0567496
45914	1.69792	-0.0471774	2.30218	-0.0585536
46049	1.90848	-0.0175	2.41724	-0.0573222
46188	1.87125	-0.0533654	2.3754	-0.0579224
46319	1.88437	-0.0436224	2.39201	-0.0569698
46455	1.89375	-0.0375	2.44072	-0.0587974
46582	1.86094	-0.0306818	2.42844	-0.0581358
46716	1.84821	-0.0239362	2.44562	-0.0595826
46854	1.92708	-0.06	2.47322	-0.0588717
46984	1.84219	-0.0429545	2.44621	-0.0569369
47120	1.80625	-0.0266447	2.45473	-0.0586207
47249	2	-0.00964287	2.52464	-0.0583276
47383	1.85625	-0.0306818	2.47607	-0.0573252
47517	1.86563	0.0121622	2.4874	-0.0576872
47651	2.00893	-0.0554348	2.55269	-0.0576872
47785	1.95341	-0.0392857	2.52269	-0.05569
47922	1.92115	-0.0475	2.51681	-0.0585183
48050	1.9981	-0.03	2.55485	-0.0581879
48191	2.0025	-0.0387097	2.56516	-0.0577101
48319	2.07422	-0.05625	2.58644	-0.0566714
48452	2.0123	-0.054	2.58884	-0.0562757
48589	2.0326	-0.0217742	2.59661	-0.0565136
48717	2.09423	-0.0511364	2.62573	-0.0558256
48853	2.11193	-0.0527344	2.65661	-0.0563274
48992	1.99415	-0.0346154	2.60898	-0.0576308
49120	2.09856	-0.0316406	2.68674	-0.0570992
49256	2.06518	-0.0680921	2.66107	-0.0572865
49390	2.04075	-0.0165441	2.65905	-0.0577309
49520	2.025	-0.0253125	2.68589	-0.0566386
49656	2.12096	-0.0680921	2.69588	-0.0573224
49786	2.14615	-0.0292808	2.71998	-0.057398
49919	2.00524	0	2.66352	-0.0592973
50052	2.10288	-0.0321429	2.70696	-0.0585349
50191	2.12292	-0.0536932	2.70133	-0.0592158
50326	1.94228	-0.0392857	2.65063	-0.0579238
50454	1.96875	-0.0213362	2.66601	-0.0577088
50586	2.15951	-0.0358696	2.73115	-0.0568943
50726	2.09856	-0.0411058	2.71529	-0.0580613
50854	2.00788	-0.0409091	2.69487	-0.0574361
50993	2.23466	-0.06	2.82236	-0.0593027
51125	2.1739	-0.0375	2.8029	-0.057464
51253	2.11193	-0.0235465	2.79878	-0.0573492
51392	2.1375	-0.01875	2.81232	-0.0568319
51522	2.21625	-0.0385714	2.85427	-0.0573832
51656	2.02255	-0.0615234	2.79369	-0.057557
51791	2.12625	-0.04375	2.85474	-0.0567198
51922	2.18125	-0.0308824	2.87869	-0.0583194
52059	2.1075	0	2.82797	-0.0558257
52194	2.05875	-0.0538043	2.85077	-0.0564228
52322	2.27359	-0.06	2.91554	-0.0580787
52460	2.15481	-0.0441964	2.87132	-0.0575334
52588	2.12096	-0.053066	2.89137	-0.0587803
52722	2.26534	-0.0493902	2.96835	-0.0580426
52856	2.22589	-0.0382075	2.92673	-0.0576419
52993	2.23393	-0.0417857	2.949	-0.0575818
53122	2.32125	0	3.01422	-0.0581655
53255	2.29875	-0.0492187	3.00165	-0.0577483
53389	2.19375	-0.0438559	3.02571	-0.0561052
53527	2.36444	0.00416669	3.05129	-0.0564898
53656	2.26712	-0.0259615	3.01718	-0.056655
53794	2.22589	-0.0518092	3.03214	-0.0568911
53928	2.325	-0.0411058	3.10216	-0.0561316
54056	2.25	-0.0325658	3.04409	-0.0583639
54196	2.32953	-0.0298469	3.08057	-0.0571721
54325	2.36518	-0.0534375	3.09855	-0.0580222
54456	2.3625	-0.036526	3.10834	-0.0577742
54596	2.23875	-0.0419491	3.07663	-0.0582651
54724	2.37054	-0.0513158	3.13113	-0.0578822
54864	2.28375	-0.0570652	3.09268	-0.0598783
54997	2.26875	-0.0369643	3.12279	-0.0594497
55123	2.34538	-0.0666667	3.14947	-0.0598968
55262	2.28214	-0.0296053	3.14709	-0.0593935
55391	2.32875	-0.0191038	3.18673	-0.0603753
55527	2.43482	-0.0436224	3.19752	-0.0589192
55659	2.29301	-0.0493151	3.17275	-0.0571919
55794	2.48625	-0.0414474	3.2719	-0.0572485
55931	2.47232	-0.02625	3.23995	-0.0569687
56064	2.35875	-0.0328125	3.21283	-0.0581408
56193	2.52463	-0.0444079	3.27601	-0.0583611
56330	2.51518	-0.0390306	3.28444	-0.0570054
56458	2.44688	-0.0125	3.27439	-0.0587664
56595	2.55536	-0.0490909	3.32644	-0.0573021
56732	2.54901	-0.0554577	3.3284	-0.0577468
56860	2.51591	-0.0547297	3.3546	-0.0572042
56994	2.52	-0.0330882	3.30656	-0.0569259
57126	2.37608	-0.0473684	3.31135	-0.0572325
57259	2.53125	-0.0133929	3.39277	-0.0586627
57399	2.49375	-0.028125	3.36918	-0.0561499
57527	2.46161	0.0138158	3.36386	-0.0575423
57665	2.5875	0.0160714	3.46964	-0.058931
57793	2.65982	-0.0545454	3.48064	-0.0578838
57927	2.57625	-0.0575	3.47588	-0.059305
58066	2.655	-0.0628676	3.49129	-0.0555494
58195	2.61066	-0.0601293	3.50552	-0.0571545
58329	2.57946	-0.135	3.50195	-0.0581071
58466	2.63125	-0.0409091	3.51715	-0.0569486
58596	2.58525	-0.0484177	3.48419	-0.0560518
58734	2.5875	-0.0482143	3.48821	-0.0541095
58868	2.65927	-0.0620192	3.51799	-0.0570337
58996	2.62125	-0.0465517	3.50385	-0.0579001
59129	2.61042	-0.0554348	3.5135	-0.0570968
59261	2.65625	-0.0400424	3.55201	-0.0549842
59398	2.6775	-0.0342391	3.57259	-0.0583572
59535	2.67054	-0.0453125	3.57757	-0.0571389
59666	2.67684	-0.0632813	3.59633	-0.0574965
59800	2.6775	-0.0632813	3.58322	-0.0580291
59928	2.69007	-0.0444079	3.61009	-0.056567
60063	2.66625	-0.0362288	3.61899	-0.0576267
60202	2.70993	-0.0462054	3.61641	-0.0574358
60330	2.69375	-0.0477273	3.62515	-0.0562993
60467	2.69375	-0.0421875	3.64273	-0.0591974
60596	2.73542	-0.0347727	3.65976	-0.0588103
60730	2.68702	-0.0317308	3.64899	-0.0594628
60870	2.76562	-0.0439024	3.68533	-0.0565884
60996	2.75625	-0.0489919	3.67506	-0.0569357
61130	2.77734	-0.0245455	3.68054	-0.057264
61268	2.72664	-0.045	3.6928	-0.0561179
61398	2.81875	-0.0457849	3.69007	-0.0573519
61531	2.6924	-0.0533898	3.66102	-0.0569681
61668	2.75625	-0.028125	3.71017	-0.0555981
61797	2.7761	-0.0192857	3.71511	-0.0580195
61932	2.7	-0.0550532	3.68821	-0.0563535
62065	2.8125	-0.0466071	3.75226	-0.0566478
62200	2.80954	-0.00833335	3.7444	-0.0578858
62331	2.73179	-0.0415385	3.73547	-0.0584521
62468	2.88409	-0.0375	3.80542	-0.0569341
62598	2.87651	-0.045	3.79519	-0.0555373
62731	2.7767	-0.0413265	3.77167	-0.057811
62866	2.92725	-0.0289286	3.84748	-0.0563848
63001	2.90966	-0.0368182	3.85619	-0.0579745
63132	2.75625	-0.0177631	3.81181	-0.0593307
63267	2.93625	0.0171196	3.92939	-0.0572161
63400	2.91563	-0.0520312	3.91893	-0.0596386
63534	2.7825	-0.039375	3.86682	-0.057462
63670	2.78437	-0.0622768	3.91326	-0.0588657
63799	2.95096	-0.0386719	3.95893	-0.057156
63932	2.85144	-0.05625	3.91454	-0.0563271
64073	2.79375	-0.0457031	3.89017	-0.0559724
64201	3.00082	-0.0304688	3.97481	-0.0577269
64339	2.9519	-0.0515625	3.94377	-0.0578526
64471	2.88281	-0.03375	3.93245	-0.0564591
64600	2.99062	-0.0493902	3.99503	-0.0564324
64740	3.08571	-0.0333984	4.02655	-0.0557778
64868	3.03239	-0.0387931	4.02074	-0.0586678
65001	3.08475	-0.0441456	4.07549	-0.0558255
65140	3.06375	-0.03125	4.06705	-0.0556524
65268	3.05625	-0.05625	4.07897	-0.058912
65408	3.12799	-0.0403846	4.12698	-0.0567295
65539	3.09375	-0.0421875	4.11966	-0.0567109
65667	3.06161	-0.0375	4.10939	-0.0567629
65807	3.12891	0	4.14803	-0.0574365
65934	3.04688	-0.0335821	4.11778	-0.0569259
66070	3.01678	-0.046875	4.13768	-0.0596355
66203	3.0825	-0.0375	4.16652	-0.0582945
66335	2.95679	-0.0355263	4.13289	-0.0600938
66473	3.05775	-0.0357955	4.13762	-0.0588947
66603	3.045	-0.05625	4.1515	-0.0579228
66736	3.0375	-0.00489131	4.14266	-0.0592156
66875	3.10842	-0.0382075	4.17006	-0.0571228
67002	3.04973	-0.0405	4.14533	-0.0557835
67141	2.9475	-0.0368534	4.1226	-0.0562745
67275	3.09808	-0.0535714	4.16472	-0.0584775
67404	3.12799	-0.0425	4.16525	-0.0578499
67541	3.04081	-0.0362288	4.13286	-0.0558471
67669	3.15804	-0.034375	4.17986	-0.0583771
67803	3.20625	-0.0493902	4.20287	-0.0574754
67943	3.17946	-0.0469565	4.19342	-0.0570245
68070	3.19375	-0.04125	4.19873	-0.0564902
68210	3.22582	-0.0465517	4.23222	-0.0568971
68338	3.20625	-0.0493902	4.21253	-0.0580192
68470	3.27138	-0.0589286	4.27154	-0.0561553
68610	3.2175	-0.0230114	4.21024	-0.0588046
68739	3.12866	-0.0525	4.18929	-0.0577161
68882	3.12799	-0.0357955	4.1948	-0.0588235
69009	3.15161	-0.0400424	4.20538	-0.0566703
69142	3.11151	-0.0027439	4.19911	-0.058949
69273	3.19963	-0.04	4.24452	-0.0578382
69406	3.1864	-0.0328125	4.25186	-0.059038
69538	3.06779	-0.0287791	4.20395	-0.0596303
69677	3.18849	-0.028125	4.24312	-0.056716
69805	3.11175	-0.05	4.18671	-0.0572101
69944	3.12837	-0.0382075	4.20956	-0.0581129
70078	3.2149	-0.034375	4.23852	-0.0558874
70205	3.09375	-0.0534375	4.17409	-0.0570355
70344	3.33199	-0.0453358	4.28349	-0.0585918
70472	3.13254	-0.0439655	4.20756	-0.0563911
70607	3.19018	-0.0430147	4.20614	-0.0569502
70745	3.25817	-0.0421875	4.24581	-0.0576898
70872	3.24225	-0.0497951	4.22044	-0.0570342
71011	3.12188	-0.0522321	4.18045	-0.0568354
71140	3.39572	-0.0332386	4.29188	-0.0562016
71274	3.23542	-0.046875	4.21052	-0.0570463
71413	3.25547	-0.0457627	4.21939	-0.0574352
71540	3.3101	-0.0578571	4.24188	-0.0558814
71674	3.24049	-0.0355263	4.18385	-0.0546429
71807	3.24178	-0.0597222	4.19953	-0.0572596
71942	3.28914	-0.0461066	4.20022	-0.0576292
72081	3.1575	-0.0475962	4.17805	-0.0583369
72207	3.15511	-0.0585	4.17152	-0.0555313
72341	3.24375	-0.0353571	4.22518	-0.0564828
72476	3.17812	-0.0459507	4.17936	-0.0591277
72609	3.13542	-0.0605769	4.16724	-0.0578294
72744	3.21975	-0.028125	4.19227	-0.056837
72875	3.23125	-0.0428571	4.18562	-0.0568284
73008	3.23891	-0.0417857	4.20184	-0.0559106
73148	3.10725	-0.0355263	4.13854	-0.0566595
73276	3.26652	-0.05625	4.21729	-0.0564234
73410	3.27548	-0.0457031	4.17643	-0.0569885
73548	3.1597	-0.0482143	4.13673	-0.0553657
73675	3.2175	-0.0508562	4.17132	-0.0577062
73815	3.33375	-0.0369643	4.19916	-0.0547684
73944	3.21875	-0.0511364	4.15634	-0.0558525
74077	3.19441	-0.0331967	4.17996	-0.0562235
74214	3.35337	-0.05625	4.2581	-0.0580238
74343	3.33199	-0.0432692	4.22322	-0.0578461
74478	3.25781	-0.0366279	4.22903	-0.0556537
74626	3.3675	-0.0351562	4.27102	-0.0579412
74744	3.33958	-0.0445312	4.25597	-0.0562003
74882	3.1769	-0.042033	4.18436	-0.05591
75016	3.34916	-0.0501923	4.26317	-0.0564507
75143	3.29063	-0.0330882	4.22323	-0.058265
75284	3.0733	-0.0287791	4.13656	-0.0565059
75412	3.2267	-0.0478723	4.24873	-0.0561998
75544	3.25516	-0.0407328	4.17458	-0.0563773
75682	3.07031	-0.042418	4.10919	-0.0564274
75815	3.13945	-0.0631098	4.16778	-0.057403
75951	3.21648	-0.0413603	4.175	-0.0549749
76083	3.05625	-0.0375	4.09699	-0.0562252
76211	3.09375	-0.0492857	4.13352	-0.0560963
76351	3.14598	-0.0506868	4.14791	-0.0563254
76479	3.00938	-0.028125	4.05966	-0.0563522
76616	3.1275	-0.0359043	4.13349	-0.0573501
76747	3.25516	-0.059879	4.13886	-0.0565789
76878	3.16575	-0.0438312	4.10625	-0.0551716
77017	3.08925	-0.0456081	4.10971	-0.0570826
77147	3.28807	-0.0633803	4.18684	-0.0554535
77279	3.22953	-0.039375	4.15625	-0.0571535
77418	3.12054	-0.028125	4.12304	-0.0595649
77546	3.27883	-0.0543103	4.21379	-0.0577743
77685	3.20625	-0.0425676	4.14173	-0.0582074
77819	3.06562	-0.0315789	4.09047	-0.0574257
77948	3.1058	-0.0241071	4.13291	-0.056896
78080	3.26458	-0.0612342	4.18656	-0.0585509
78213	3.04183	-0.0464062	4.11621	-0.0576401
78347	3.14567	-0.0490385	4.16115	-0.0575945
78487	3.36277	-0.0595588	4.23463	-0.0563463
78616	3.17163	-0.0532895	4.14882	-0.0579701
78753	3.18542	-0.0286765	4.19058	-0.0564808
78886	3.38125	-0.0601744	4.25864	-0.0587207
79014	3.09375	-0.0433929	4.13737	-0.0570363
79153	3.05625	-0.0120536	4.14362	-0.058556
79282	3.25739	-0.0640086	4.21961	-0.0586678
79417	3.11971	-0.0456081	4.14113	-0.0589558
79548	2.9875	-0.054	4.11249	-0.056717
79682	3.2498	-0.0511364	4.21462	-0.0551859
79821	3.07768	-0.04725	4.13228	-0.0581449
79950	3.13542	-0.054878	4.15153	-0.0584731
80081	3.17411	-0.0576563	4.16771	-0.0584609
80221	3.24911	-0.046875	4.19414	-0.0556553
80349	3.09375	-0.0455357	4.14284	-0.0567432
80489	3.33342	-0.0569805	4.23529	-0.0563745
80622	3.23304	-0.0514286	4.20537	-0.0563987
80748	3.20625	-0.0482143	4.17306	-0.0557756
80887	3.29464	-0.05625	4.24348	-0.0585387
81016	3.29228	-0.0601293	4.19965	-0.0567694
81151	3.18068	-0.060994	4.20989	-0.0559941
81289	3.2175	-0.043875	4.18653	-0.0574711
81418	3.13661	-0.0330882	4.15298	-0.0559392
81556	3.09808	-0.0486111	4.14594	-0.0579036
81684	3.09375	-0.0417339	4.14687	-0.0565948
81817	3.06659	-0.0412129	4.1542	-0.0576323
81955	3.05795	-0.0432692	4.13953	-0.0564828
82083	3.04125	-0.0454327	4.13017	-0.0575481
82217	3.13125	-0.0576219	4.13852	-0.0561743
82357	3.05822	-0.059375	4.11772	-0.0592078
82488	3.02625	-0.0398077	4.08907	-0.0572095
82622	3.13945	-0.0458333	4.15066	-0.0589755
82751	3.15375	-0.055	4.13187	-0.0561994
82885	3.04261	-0.0388636	4.0878	-0.0543103
83025	3.09375	-0.0592105	4.14399	-0.0608258
83153	3.19158	-0.0360577	4.15259	-0.0575759
83289	3.01875	-0.0321429	4.11602	-0.0566282
83418	3.10625	-0.0549419	4.13162	-0.0584135
83552	3.1627	-0.0475961	4.15383	-0.0569901
83692	3.05795	-0.0438559	4.10882	-0.0572323
83820	3.09375	-0.0443662	4.15007	-0.0584694
83954	3.12188	-0.0622768	4.15388	-0.0585041
84091	3.02946	-0.0466981	4.12503	-0.0582334
84219	3.07969	-0.0333333	4.13107	-0.058186
84359	3.01875	-0.03375	4.11092	-0.0581161
84493	3.02625	-0.0463235	4.09796	-0.0589811
84621	3.05156	-0.0375	4.11823	-0.0581205
84754	2.91142	-0.0206633	4.03325	-0.0545488
84886	2.95312	-0.0522321	4.07791	-0.058789
85022	2.925	-0.0333333	4.06792	-0.0569412
85155	2.93723	-0.0426136	4.03788	-0.0568966
85290	2.9398	-0.0368182	4.06077	-0.0572737
85424	3.03375	-0.0516892	4.10502	-0.057707
85554	2.99813	-0.0375	4.07646	-0.057226
85688	2.92232	-0.0414474	4.07584	-0.0581522
85827	2.94609	-0.003125	4.05018	-0.0570112
85956	2.95529	-0.0428571	4.04481	-0.0560353
86091	2.92875	-0.05625	4.02853	-0.0574833
86226	2.86364	-0.0497951	3.97719	-0.0566364
86356	2.82857	-0.0327273	3.97179	-0.0593431
86490	2.93523	-0.0321429	3.98408	-0.0566225
86621	2.87775	-0.0493902	3.95827	-0.0581461
86755	2.77582	-0.0151442	3.91387	-0.0597336
86895	2.99901	-0.0229592	4.02257	-0.0582692
87023	2.93542	-0.0317935	3.97166	-0.0570042
87162	2.79375	-0.0416667	3.91924	-0.0580206
87294	2.90966	-0.0475962	3.97904	-0.0570999
87422	2.96116	-0.0452446	4.00841	-0.0550283
87562	2.86875	-0.0535714	3.95163	-0.0589079
87690	2.89687	-0.025	3.95401	-0.0572697
87824	3.10179	0	4.04224	-0.0578053
87960	2.90625	-0.0520313	3.95114	-0.0576852
88091	2.79375	-0.0436567	3.9202	-0.0557609
88230	2.93304	-0.0316406	3.9808	-0.0572747
88363	2.94545	-0.0649648	3.95568	-0.0587907
88491	2.65982	-0.0529412	3.83584	-0.0611634
88629	2.85938	-0.0416096	3.90078	-0.0580819
88757	2.8575	-0.0511364	3.90405	-0.0568729
88891	2.68367	-0.0328846	3.79785	-0.0592105
89030	2.67292	-0.0291667	3.81216	-0.0583627
89162	2.75625	-0.0417857	3.81879	-0.0580458
89296	2.65398	0.00833333	3.76613	-0.0561143
89424	2.6325	-0.0435484	3.7564	-0.0605561
89558	2.79049	-0.03825	3.81538	-0.0576672
89699	2.70993	-0.0495763	3.7656	-0.0590082
89826	2.63125	-0.0524272	3.71984	-0.058855
89962	2.78071	-0.0419491	3.80594	-0.0587166
90092	2.73516	-0.0503731	3.7632	-0.0573124
90225	2.67656	-0.0478448	3.73875	-0.0565954
90365	2.80516	-0.0369141	3.80375	-0.0575266
90493	2.77425	0.0209302	3.77211	-0.0582175
90625	2.65559	-0.0776786	3.73904	-0.0606629
90763	2.79882	-0.05625	3.81935	-0.0575491
90893	2.72025	-0.0230114	3.76061	-0.0589758
91032	2.55511	0.0169811	3.69942	-0.0598773
91164	2.7825	-0.0317935	3.80219	-0.0606595
91292	2.76429	-0.0613636	3.76803	-0.0582295
91427	2.64375	-0.0590164	3.71314	-0.0592536
91560	2.61875	-0.0472826	3.73224	-0.0593781
91695	2.68875	-0.0384868	3.75182	-0.0573529
91828	2.68661	-0.0387931	3.72118	-0.0582106
91964	2.58075	-0.05625	3.68481	-0.0592218
92099	2.61964	-0.0519231	3.7306	-0.060874
92233	2.69755	-0.0309375	3.71684	-0.060766
92362	2.49034	-0.0271552	3.63668	-0.0594635
92496	2.4375	-0.0355263	3.60806	-0.0599289
92627	2.66384	-0.0271552	3.67517	-0.0595005
92765	2.4675	-0.0579545	3.57241	-0.0581286
92896	2.38661	-0.0542411	3.52152	-0.0578315
93029	2.54103	-0.0630682	3.60268	-0.0582738
93166	2.55134	-0.0173077	3.57792	-0.0566004
93295	2.4625	-0.0426724	3.55212	-0.0580611
93428	2.5625	0.00267857	3.58322	-0.059434
93568	2.56587	-0.0535714	3.58985	-0.0592849
93696	2.44125	-0.0446691	3.53985	-0.0564578
93835	2.57344	-0.042	3.59106	-0.0588143
93967	1.69554	-0.0362903	3.50898	-0.059583
94096	2.37784	-0.0184091	3.50258	-0.0586192
94231	2.47244	0.0214286	3.52129	-0.0578541
94364	2.29301	-0.0426136	3.4253	-0.0583447
94496	2.30625	-0.0409091	3.50417	-0.0570562
94633	2.46563	-0.0398437	3.49757	-0.0570372
94765	2.45184	-0.0527344	3.47941	-0.0576797
94904	2.38322	-0.0287234	3.47419	-0.0551896
95032	2.55825	-0.051506	3.50931	-0.0570027
95163	2.38807	-0.0576219	3.44353	-0.0569178
95298	2.35045	-0.0488487	3.42212	-0.0570546
95430	2.32031	-0.0157895	3.40674	-0.0564716
95567	2.25625	-0.028125	3.34633	-0.0565868
95704	2.20699	-0.0368852	3.35552	-0.0578783
95830	2.24732	-0.0515625	3.30166	-0.0578982
95969	2.23125	-0.0133929	3.33747	-0.0579415
96098	2.23594	-0.0475352	3.29787	-0.0573142
96232	2.22684	-0.0256579	3.2963	-0.0575307
96372	2.07	-0.0452744	3.23493	-0.0601955
96497	2.34455	-0.0418883	3.29936	-0.0570387
96636	2.1525	-0.0235465	3.23595	-0.0580296
96771	2.09577	-0.0407328	3.19536	-0.0584878
96900	2.23542	-0.0321429	3.27109	-0.0577425
97038	2.16307	-0.0368852	3.21302	-0.0572146
97165	2.10268	-0.040625	3.16595	-0.0562756
97299	2.24567	-0.0475	3.22171	-0.0564312
97439	2.30625	-0.033446	3.2304	-0.058758
97566	2.19375	-0.0253125	3.20865	-0.0574829
97705	2.295	-0.0475962	3.22946	-0.0575475
97837	2.2125	-0.0176471	3.20821	-0.0573387
97966	2.14875	-0.0342391	3.16001	-0.0587274
98106	2.25804	-0.0375	3.22562	-0.0581585
98234	2.08787	-0.0154412	3.14007	-0.0584335
98368	2.14554	-0.03375	3.159	-0.0568942
98505	2.08125	-0.0327532	3.11379	-0.0593096
98637	2.09148	0.00964285	3.11904	-0.0572488
98773	2.01375	-0.0107143	3.06261	-0.0579748
98902	2.05057	-0.02475	3.0561	-0.0569106
99035	2.00312	-0.0349138	3.03571	-0.0575581
99173	2.00893	-0.0198529	3.0341	-0.0602113
99301	1.99591	-0.0346154	3.00759	-0.058613
99439	2.04154	-0.0403846	3.02545	-0.0596543
99574	1.99038	-0.0490099	3.01567	-0.058642
99703	1.86429	-0.0480769	2.95793	-0.059764
99834	2.12885	-0.0409091	3.05293	-0.0603032
99968	1.99904	-0.027057	2.98939	-0.0584095
100101	1.95268	-0.0125	2.96231	-0.0591154
100241	2.0375	-0.0424528	3.01207	-0.0596917
100369	2.05	-0.0327273	2.98362	-0.0562239
100507	1.90446	-0.0525	2.92754	-0.0578527
100636	2.0918	-0.0313525	3.00086	-0.0587997
100770	2.07422	-0.05	2.97072	-0.0564077
100905	1.84219	-0.0487952	2.8966	-0.0615674
101037	1.98409	-0.0125	2.92651	-0.0580628
101170	2.02969	-0.0351562	2.94408	-0.0600864
101303	1.90982	-0.0102273	2.89287	-0.0581089
101438	1.84219	-0.0315789	2.89758	-0.058502
101575	2.03125	0.01125	2.93102	-0.0596033
101704	1.90875	-0.0497596	2.85819	-0.0584605
101836	1.73713	-0.0204545	2.80129	-0.0609984
101972	1.98125	-0.025	2.88774	-0.0593322
102105	1.87875	-0.0241071	2.81012	-0.0590585
102240	1.75625	-0.0251866	2.781	-0.0597307
102375	1.89192	-0.0311538	2.83431	-0.0594554
102504	1.87425	-0.0395833	2.80392	-0.0610506
102642	1.78977	-0.05	2.78619	-0.0597428
102772	1.88325	-0.0401786	2.80753	-0.0587394
102906	1.91581	-0.0330882	2.83437	-0.0590071
103044	1.90385	-0.01125	2.80677	-0.0611574
103171	1.83068	-0.0209746	2.78003	-0.0585
103310	1.84441	-0.0385274	2.80992	-0.0611178
103439	1.97853	-0.0457031	2.80176	-0.0596928
103573	1.79196	-0.0333333	2.72612	-0.0588378
103710	1.78958	-0.0335821	2.7147	-0.0603424
103838	2.03063	-0.0346154	2.81273	-0.0588723
103972	1.73625	-0.0548077	2.67617	-0.0598782
104113	1.72575	-0.045	2.67359	-0.0588008
104240	1.80456	-0.0137195	2.69064	-0.0599485
104377	1.91875	-0.02475	2.70916	-0.0573682
104511	1.71875	-0.0242647	2.63988	-0.06006
104639	1.76538	-0.0130814	2.62614	-0.0602624
104776	1.89	-0.0296053	2.70388	-0.0598317
104908	1.75312	-0.0417857	2.63389	-0.0597573
105040	1.75446	-0.0440878	2.65405	-0.0609063
105173	1.80433	-0.0203125	2.65813	-0.0585839
105310	1.7325	-0.039375	2.60424	-0.0588785
105441	1.67344	-0.0340909	2.58854	-0.060393
105579	1.74375	-0.0277597	2.59387	-0.0586344
105707	1.6114	-0.0369643	2.51383	-0.0579804
105847	1.79437	-0.0541139	2.57511	-0.0612267
105974	1.77589	-0.0315	2.54669	-0.0595954
106113	1.6108	-0.0382732	2.48692	-0.0589134
106243	1.8	-0.0380515	2.57408	-0.0602143
106374	1.81205	-0.0297794	2.54732	-0.0604526
106508	1.65625	-0.0416667	2.49078	-0.0611911
106641	1.69375	-0.0404494	2.55321	-0.060318
106776	1.90875	-0.0340116	2.57171	-0.0597605
106914	1.67143	-0.0474609	2.47437	-0.0596398
107041	1.725	-0.0581461	2.46619	-0.0574564
107181	1.89225	-0.00703125	2.56282	-0.0603093
107315	1.72232	-0.0477273	2.4636	-0.0597176
107443	1.71728	-0.0356013	2.46525	-0.0585375
107580	1.77111	-0.0432692	2.46642	-0.06151
107709	1.69018	-0.0438559	2.42798	-0.061676
107843	1.6114	-0.0245455	2.4338	-0.059489
107976	1.66774	-0.0233491	2.42776	-0.059531
108112	1.60478	-0.0247881	2.37241	-0.0595527
108247	1.57902	-0.0411585	2.35585	-0.0602846
108381	1.56375	-0.0501923	2.36691	-0.0564351
108509	1.49279	-0.0455357	2.29529	-0.0609953
108650	1.57745	-0.028125	2.34834	-0.0592281
108778	1.61349	-0.028125	2.33726	-0.0599119
108914	1.54602	-0.0495763	2.27247	-0.0595249
109043	1.59375	-0.0286765	2.3201	-0.060556
109177	1.62563	-0.0310345	2.31878	-0.059093
109317	1.57933	-0.0254032	2.29199	-0.058738
109445	1.5	-0.0552966	2.25495	-0.0574511
109579	1.64531	-0.0302239	2.32169	-0.0615226
109716	1.55925	-0.0400685	2.2399	-0.0586841
109844	1.47825	-0.0340909	2.23747	-0.058698
109985	1.54575	-0.045	2.23088	-0.0613005
110118	1.54792	-0.0419118	2.20398	-0.0619211
110245	1.44596	-0.0426724	2.19581	-0.0621149
110383	1.44596	-0.0379213	2.17063	-0.0593764
110511	1.47157	-0.0453358	2.15475	-0.0594149
110647	1.47548	-0.0586957	2.14375	-0.0598439
110785	1.50341	-0.0516892	2.14887	-0.059607
110913	1.34375	-0.0316901	2.06283	-0.0591599
111052	1.55788	-0.0457031	2.14632	-0.0581122
111185	1.49732	-0.0424528	2.06589	-0.0586023
111314	1.29967	-0.0257813	1.98054	-0.0571721
111453	1.42875	-0.0145833	2.08413	-0.0582359
111581	1.64025	-0.0191489	2.10173	-0.055848
111715	1.29375	-0.0391854	1.97196	-0.0585802
111846	1.29375	-0.0477876	1.98993	-0.0597247
111984	1.58304	-0.0488208	2.11804	-0.0584002
112120	1.35	-0.0347426	1.98905	-0.0586911
112246	1.25822	-0.0375	1.96671	-0.0590498
112380	1.41975	-0.0427215	2.00853	-0.0601293
112521	1.36688	-0.03125	1.98103	-0.0615478
112648	1.22625	-0.0318396	1.92584	-0.0616304
112786	1.38516	-0.0276639	1.96554	-0.0596398
112919	1.41375	-0.0517857	1.94187	-0.0624307
113047	1.1625	-0.0460227	1.85625	-0.0635441
113182	1.27232	-0.028125	1.89174	-0.0630963
113316	1.28672	-0.0379518	1.87728	-0.0605537
113450	1.21563	-0.0445055	1.79379	-0.0604656
113587	1.18125	-0.0356013	1.79428	-0.062055
113715	1.31484	-0.0375	1.82907	-0.0611774
113851	1.34598	-0.0342988	1.82019	-0.0592769
113982	1.23348	-0.0286017	1.78367	-0.0594061
114115	1.33125	-0.0140625	1.79459	-0.0611765
114248	1.41789	0	1.82584	-0.0618574
114380	1.29375	-0.0357143	1.80113	-0.0586827
114514	1.30398	-0.0399671	1.7894	-0.0588982
114651	1.21616	-0.0275	1.74786	-0.0604106
114786	1.3125	-0.050625	1.80022	-0.0639044
114919	1.31743	-0.0484375	1.78414	-0.0599609
115047	1.30446	-0.0380515	1.76083	-0.0624084
115181	1.31484	-0.035462	1.74634	-0.0595098
115322	1.47115	-0.0398077	1.82828	-0.0586593
115449	1.15125	-0.0425305	1.69231	-0.0618774
115583	1.31625	-0.0313525	1.75992	-0.061652
115715	1.39219	-0.0428571	1.7653	-0.0619182
115848	1.21406	-0.0229167	1.65203	-0.0605405
115988	1.14375	-0.0225	1.67929	-0.0614023
116116	1.2375	-0.0258197	1.65059	-0.0615342
116248	1.12169	-0.036	1.56849	-0.0610318
116388	1.02375	-0.0346154	1.56238	-0.0609653
116516	1.00982	-0.0230769	1.56074	-0.062472
116657	1.02375	0.00351562	1.54482	-0.0618309
116784	1.01602	-0.0542411	1.54547	-0.0617143
116915	0.939375	-0.00340909	1.49414	-0.062455
117054	0.977083	-0.0463235	1.50947	-0.0628898
117183	1.11797	-0.045	1.54947	-0.0631656
117318	1.0394	-0.0171196	1.54588	-0.0609113
117451	1.00919	-0.0381696	1.52465	-0.0605543
117587	1.125	-0.0273649	1.54428	-0.0603742
117721	1.10141	-0.0291667	1.53316	-0.0609887
117857	0.946875	-0.0397059	1.45889	-0.0599065
117985	1.01042	-0.0516892	1.48179	-0.0609086
118122	1.00739	-0.0310345	1.45997	-0.0613283
118250	0.924107	-0.057398	1.41879	-0.0605084
118385	1.00027	-0.0289286	1.46225	-0.0613278
118523	1.02115	-0.0474609	1.40665	-0.0596306
118652	0.876838	-0.031117	1.33864	-0.0593039
118789	0.997697	-0.035041	1.32399	-0.0602696
118918	0.99254	-0.034375	1.34169	-0.0611834
119051	0.8775	-0.0520312	1.31283	-0.0619094
119192	0.946467	-0.0458882	1.32557	-0.0593737
119320	0.975	-0.0290948	1.32787	-0.0607025
119456	0.88875	-0.0261628	1.30386	-0.06173
119590	0.93125	-0.0330882	1.31821	-0.0602928
119718	1.02188	-0.0375	1.31388	-0.0606747
119858	0.971767	-0.0381356	1.31221	-0.0599071
119987	0.868207	-0.0329741	1.21132	-0.0597807
120121	1.15446	0.0325658	1.31673	-0.0568211
120252	0.995956	-0.045	1.20575	-0.0583966
120389	0.791518	-0.0259615	1.05727	-0.0595844
120526	0.95	-0.0045	1.19846	-0.0592575
120654	1.02937	-0.0399194	1.19443	-0.057132
120787	0.826875	-0.0321429	1.08342	-0.0597372
120921	0.916331	-0.0436224	1.04944	-0.0614205
121053	1.07679	-0.00899999	1.25526	-0.0604286
121189	0.944408	-0.0576562	1.06678	-0.0593391
121322	0.882543	-0.0456522	1.03404	-0.0578152
121459	1.02375	-0.03825	1.18125	-0.0604651
121592	0.88125	-0.0317935	1.04062	-0.0587992
121720	0.785054	-0.0214286	1.057	-0.0618868
121855	0.929464	-0.054878	1.02073	-0.0596569
121995	0.88125	-0.0507353	1.03301	-0.0599815
122121	0.838125	-0.028125	0.952061	-0.0602728
122258	0.837132	-0.0234375	0.949771	-0.0601825
122393	0.8125	-0.00661764	0.954808	-0.0607297
122523	0.860625	-0.01875	1.07875	-0.0580346
122657	0.745313	-0.0383523	0.940179	-0.0621073
122788	0.76275	-0.0554577	0.95625	-0.0617792
122922	0.853125	-0.0321429	1.07753	-0.0619019
123072	0.748125	-0.050266	0.97875	-0.0616548
123189	0.78125	-0.0485294	0.95625	-0.0600679
123330	0.713487	-0.0193966	0.831646	-0.062115
123456	0.74925	-0.0365625	0.976103	-0.0601167
123589	0.666964	-0.0498418	0.814518	-0.0636673
123729	0.675	0.0302885	0.826798	-0.0619594
123857	0.63125	0	0.840513	-0.0659851
123991	0.585	-0.0516892	0.80579	-0.0626926
124123	0.516477	-0.0446121	0.807692	-0.0655076
124256	0.539338	-0.0384146	0.691875	-0.0623119
124390	0.527885	-0.0097826	0.694815	-0.0627554
124531	0.589402	-0.0232759	0.695119	-0.0633803
124658	0.538393	-0.0436567	0.671429	-0.0631667
124793	0.470455	-0.0220588	0.627573	-0.0647107
124924	0.703125	-0.0530172	0.684783	-0.0605485
125059	0.495536	-0.0507042	0.572177	-0.0632639
125197	0.345536	-0.0463235	0.510861	-0.0633985
125326	0.530357	-0.0396127	0.610531	-0.0650949
125462	0.534375	-0.0367788	0.55242	-0.0624747
125591	0.23625	-0.0177632	0.453078	-0.0613475
125725	0.361607	-0.0110294	0.472596	-0.0623705
125865	0.499632	-0.0331967	0.546901	-0.0623893
125993	0.419153	-0.0413603	0.478472	-0.0629091
126130	0.45	-0.04725	0.502014	-0.0614969
126263	0.521591	-0.048913	0.489423	-0.0609647
126392	0.44775	-0.0411585	0.482283	-0.0607957
126532	0.58125	-0.0425	0.583157	-0.0628192
126660	0.529687	-0.0346154	0.504844	-0.0628436
126792	0.51975	-0.0346154	0.500182	-0.0621925
126931	0.572727	-0.0344388	0.512946	-0.0627378
127061	0.512868	-0.0461842	0.476324	-0.060238
127199	0.39375	-0.0392442	0.454611	-0.0623988
127331	0.559821	0.015625	0.47835	-0.0618483
127459	0.467578	-0.025	0.405208	-0.0619794
127598	0.28125	-0.0294231	0.370041	-0.0635696
127728	0.446691	-0.0332746	0.442434	-0.0615557
127862	0.467578	-0.0375	0.366595	-0.0603554
127998	0.309375	-0.0218284	0.340151	-0.0614805
128127	0.373897	-0.0341518	0.37469	-0.0608313
128265	0.458036	-0.0425676	0.38588	-0.0601332
128395	0.425893	-0.0350649	0.36987	-0.0623994
128529	0.35625	-0.0335821	0.367543	-0.060104
128665	0.420905	-0.00882352	0.355141	-0.0623671
128794	0.340179	-0.0516892	0.327764	-0.0606489
128931	0.314063	-0.0384146	0.341335	-0.0590439
129067	0.22875	-0.0413603	0.296053	-0.060764
129196	0.330469	-0.0533505	0.273214	-0.0608147
129333	0.320956	-0.0454787	0.259226	-0.0598695
129461	0.18675	-0.0237676	0.239062	-0.0580766
129595	0.179464	-0.0425	0.223415	-0.0592153
129735	0.352841	-0.0454545	0.233949	-0.0599367
129863	0.271023	-0.0469937	0.24375	-0.0590766
130001	0.107812	-0.0427817	0.1343	-0.0607325
130129	0.352303	-0.0340909	0.238081	-0.0607575
130262	0.3375	-0.0452922	0.232337	-0.0611899
130398	0.117188	-0.02475	0.138419	-0.0585146
130531	0.240341	-0.036	0.178846	-0.0633518
130663	0.327574	-0.046792	0.161525	-0.0588006
130796	0.178533	-0.0386719	0.142105	-0.0593091
130930	0.233036	-0.0400862	0.145781	-0.059902
131069	0.214773	-0.039527	0.151442	-0.0613467
131204	0.152679	-0.0325658	0.0520661	-0.0610817
131330	0.11625	-0.0275943	0.0896658	-0.0625978
131469	0.0951923	-0.0344758	0.0121202	-0.0615385
131597	0.0321429	0.0173077	0.0207237	-0.0582181
131733	0.125	-0.0334158	0.0122024	-0.0609146
131866	0.00411585	-0.04375	-0.0654891	-0.0614964
131997	0.0703125	-0.015	0.0304303	-0.0632216
132136	0.225	-0.0457627	0.0381618	-0.0590235
132264	0.14375	-0.0121622	-0.0442355	-0.0594853
132399	-0.0401786	-0.0375	-0.0891152	-0.0609562
132538	0.27225	-0.0403533	0.0398665	-0.0585351
132664	0.145066	-0.034322	-0.0722477	-0.0602449
132804	-0.0375	-0.0415385	-0.152027	-0.0593536
132938	0.0914062	-0.0102273	-0.0621452	-0.0598182
133066	0.265909	-0.0360849	-0.0373026	-0.0577665
133205	0.0225	-0.0383242	-0.136932	-0.0582869
133332	0.0625	-0.0477273	-0.101586	-0.0596671
133466	0.316776	-0.0398437	0.0120259	-0.0597183
133605	0.196875	-0.0295312	-0.0824574	-0.0580165
133735	0.249107	-0.0350649	-0.0129807	-0.0569306
133871	0.14375	-0.0403846	-0.0939967	-0.0607128
134004	0.126563	-0.018	-0.0777095	-0.0597337
134133	0.10575	-0.0482143	-0.0880435	-0.0607651
134268	0.132589	-0.0385714	-0.100171	-0.057822
134401	0.106875	-0.0411972	-0.122104	-0.0598535
134535	0.05625	0.0170455	-0.18244	-0.0588454
134672	-0.0349662	-0.0522321	-0.186648	-0.0611696
134800	0.0119318	-0.0402985	-0.215396	-0.0624899
134940	-0.01875	-0.0441964	-0.235075	-0.0623691
135068	-0.120101	-0.0362903	-0.318391	-0.0653301
135201	-0.0252155	-0.0296053	-0.26775	-0.0616239
135339	-0.10625	-0.0444767	-0.303454	-0.0631555
135467	-0.133224	-0.0425305	-0.355439	-0.0625899
135606	-0.217969	-0.0257813	-0.395665	-0.0634159
135736	-0.22875	-0.0461538	-0.41288	-0.0639004
135869	-0.126563	-0.0351562	-0.400542	-0.0620906
136006	-0.126563	-0.0571154	-0.415366	-0.0638862
136135	-0.163636	-0.0347426	-0.379327	-0.0610455
136268	-0.06875	-0.0366279	-0.392878	-0.0638756
136408	-0.116827	-0.0324153	-0.418701	-0.060403
136537	-0.210938	-0.0411585	-0.415509	-0.0626696
136675	-0.158523	-0.0321429	-0.440074	-0.0619933
136807	-0.377679	-0.0461066	-0.522933	-0.0642724
136937	-0.269408	-0.059434	-0.517584	-0.0627971
137076	-0.276136	-0.0375	-0.507548	-0.0626693
137204	-0.493269	-0.04125	-0.615031	-0.0627026
137336	-0.291477	-0.0314338	-0.536811	-0.0571699
137470	-0.25425	-0.0225	-0.576411	-0.0617384
137608	-0.388393	-0.062069	-0.632812	-0.0609797
137743	-0.376875	-0.0552273	-0.622059	-0.0609871
137870	-0.163859	-0.0266447	-0.61375	-0.0599341
138003	-0.33375	-0.04275	-0.623864	-0.062078
138142	-0.469853	-0.0478723	-0.681007	-0.0617163
138272	-0.22306	-0.05625	-0.595312	-0.0602913
138408	-0.20788	-0.0321429	-0.639086	-0.0611007
138542	-0.520312	-0.0445312	-0.714254	-0.0606561
138670	-0.520312	-0.0443182	-0.688599	-0.0639319
138804	-0.155769	-0.0492187	-0.629106	-0.0604283
138939	-0.484821	-0.0519231	-0.76657	-0.0586057
139072	-0.625	-0.0444079	-0.759918	-0.0637294
139209	-0.21375	-0.0329741	-0.587647	-0.0619232
139338	-0.20625	-0.05	-0.672011	-0.059168
139476	-0.481641	-0.0145161	-0.768095	-0.0587114
