# Supplementary material for: Cell cycle and age-related modulations of mouse chromosome stiffness
Source: eLife. 2025 Apr 14;13:RP97403. doi: 10.7554/eLife.97403 (PMC11996174; doi:10.7554/eLife.97403)
Supplement: Figure 1—figure supplement 2—source data 1. [file elife-97403-fig1-figsupp2-data1.xlsx]

## Sheet: Sheet1
Figure 1 - Figure supplement 2 left panel Source data 1
Immediately after isolation	After 1h in PBS
0.585598	0.303796
0.586022	0.367719
2.40416	2.77456
1.96628	1.25958
0.632988	0.631583
1.27117	0.94142
0.472677	0.587119
0.374246	0.383379
0.706855	0.806508
