# Supplementary material for: Cell cycle and age-related modulations of mouse chromosome stiffness
Source: eLife. 2025 Apr 14;13:RP97403. doi: 10.7554/eLife.97403 (PMC11996174; doi:10.7554/eLife.97403)
Supplement: Figure 1—figure supplement 2—source data 2. [file elife-97403-fig1-figsupp2-data2.xlsx]

## Sheet: Sheet1
Figure 1 - Figure supplement 2 right panel Source data 1
Immediately after isolation	After Triton X-100
1.06136	1.34623
0.924956	1.12826
0.450575	0.643984
0.850258	0.432006
2.08135	2.15878
0.506056	0.592595
1.12544	1.0999
