# Supplementary material for: Cell cycle and age-related modulations of mouse chromosome stiffness
Source: eLife. 2025 Apr 14;13:RP97403. doi: 10.7554/eLife.97403 (PMC11996174; doi:10.7554/eLife.97403)
Supplement: Figure 2—figure supplement 1—source data 1. [file elife-97403-fig2-figsupp1-data1.xlsx]

## Sheet: Sheet1
Figure 2 - Figure supplement 1 Source data 1
Mitotic	MI oocyte	MII oocyte	WT Spermatocytes Prophase I
306.385	3537.46	537.53	4506.71
399.963	1459.45	231.886	1221.32
99.6221	4803.66	496.116	922.994
142.158	9643.34	582.46	774.793
66.7371	2012.11	424.364	1472.51
191.387	4264.79	624.622	2545.57
302.262	2509.18	636.689	763.708
148.067	1953.92	571.979	1333.91
