# Supplementary material for: Cell cycle and age-related modulations of mouse chromosome stiffness
Source: eLife. 2025 Apr 14;13:RP97403. doi: 10.7554/eLife.97403 (PMC11996174; doi:10.7554/eLife.97403)
Supplement: Figure 2—source data 1. [file elife-97403-fig2-data1.xlsx]

## Sheet: Sheet1
Figure 2 - Source Data 1
Figure 2B Chromosome stiffness comparison across different cell types
MEF(Mitotic)	MI oocyte control	MII oocyte	WT Spermatocytes Prophase I
502.27	3143.59	766.412	6425.68
654.645	2080.88	330.623	1999.01
394.56	6849.07	941.756	1752.08
202.689	6391.81	729.908	2054.2
74.0818	1788.07	308.703	1634.56
170.078	4734.15	1391.54	4166.49
573.772	3144.37	463.16	1449.71
118.752	2168.96	458.735	2183.3
