# Supplementary material for: Cell cycle and age-related modulations of mouse chromosome stiffness
Source: eLife. 2025 Apr 14;13:RP97403. doi: 10.7554/eLife.97403 (PMC11996174; doi:10.7554/eLife.97403)
Supplement: Figure 3—figure supplement 1—source data 1. [file elife-97403-fig3-figsupp1-data1.xlsx]

## Sheet: Sheet1
Figure 3-Figure supplement 1 - Source Data 1
CD-1	C57BL/6
6425.68	1775.19
1999.01	2560.42
1752.08	3509.31
2054.2	4957.29
1634.56	2437.27
4166.49	6736.67
1449.71	2263.74
2183.3	2065.61
