# Supplementary material for: Cell cycle and age-related modulations of mouse chromosome stiffness
Source: eLife. 2025 Apr 14;13:RP97403. doi: 10.7554/eLife.97403 (PMC11996174; doi:10.7554/eLife.97403)
Supplement: Figure 3—source data 1. [file elife-97403-fig3-data1.xlsx]

## Sheet: Sheet1
Figure 3 - Source Data 1
Figure 3E Chromosome stiffness comparison across various cell types
WT Spermatocytes Prophase I	Rec8 Spermatocyte Prohpase I	Stag3 Spermatocyte Prophase I	Rad21l spermatocyte Prophase I
6425.68	1460.52	1908.09	2078.62
1999.01	2504.62	2686.18	2831.12
1752.08	5956.12	2926.07	1285.93
2054.2	1583.6	2479.03	1898.67
1634.56	3138.95	2142.06	776.546
4166.49	1003.04	1850.76	2164.6
1449.71	923.742	2262.26	2380.24
2183.3	4100.44	935.099	4844.86
		2926.95	923.677
			1320.83
