# Supplementary material for: Cell cycle and age-related modulations of mouse chromosome stiffness
Source: eLife. 2025 Apr 14;13:RP97403. doi: 10.7554/eLife.97403 (PMC11996174; doi:10.7554/eLife.97403)
Supplement: Figure 4—source data 1. [file elife-97403-fig4-data1.xlsx]

## Sheet: Sheet1
Figure 4 - Source Data 1
Figure 4B Chromosome stiffness comparison between MI oocytes from 3-4 week-old mice and 48-week-old mice
3-4 week old MI oocyte	12 month old MI oocyte
3143.59	3538.96
2080.88	8058.34
6849.07	11219.2
6391.81	5936.4
1788.07	11974.1
4734.15
3144.37
2168.96
