# Supplementary material for: Cell cycle and age-related modulations of mouse chromosome stiffness
Source: eLife. 2025 Apr 14;13:RP97403. doi: 10.7554/eLife.97403 (PMC11996174; doi:10.7554/eLife.97403)
Supplement: Figure 5—source data 1. [file elife-97403-fig5-data1.xlsx]

## Sheet: Sheet1
Figure 5 - Source Data 1
Figure 5C Chromosome stiffness comparison between mitotic cells, control MI oocytes, 5 μg/ml etoposide-treated MI oocytes, 25 μg/ml etoposide-treated MI oocytes and 50 μg/ml etoposide-treated MI oocyte
MEF(Mitotic)	MI oocyte control	MI oocyte (5ug/ml etoposide)	MI oocyte (25ug/ml etoposide)	MI oocyte (50ug/ml etoposide)
502.27	3143.59	4633.74	685.615	1487.17
654.645	2080.88	5944.95	3253.42	944.301
394.56	6849.07	2333.7	2608.55	4110.4
202.689	6391.81	3826.2	2069.32	3049.67
74.0818	1788.07	4273.74	1717.14	1581.58
170.078	4734.15	4344.02	1107.63	1046.96
573.772	3144.37	2338.3	1017.49	836.174
118.752	2168.96	3760.03	648.436	653.638
